# Supplementary figures and images for: The LIM protein complex establishes a retinal circuitry of visual adaptation by regulating Pax6 α-enhancer activity
Source: eLife journal article supplement (doi:10.7554/elife.21303), 2017-01-31

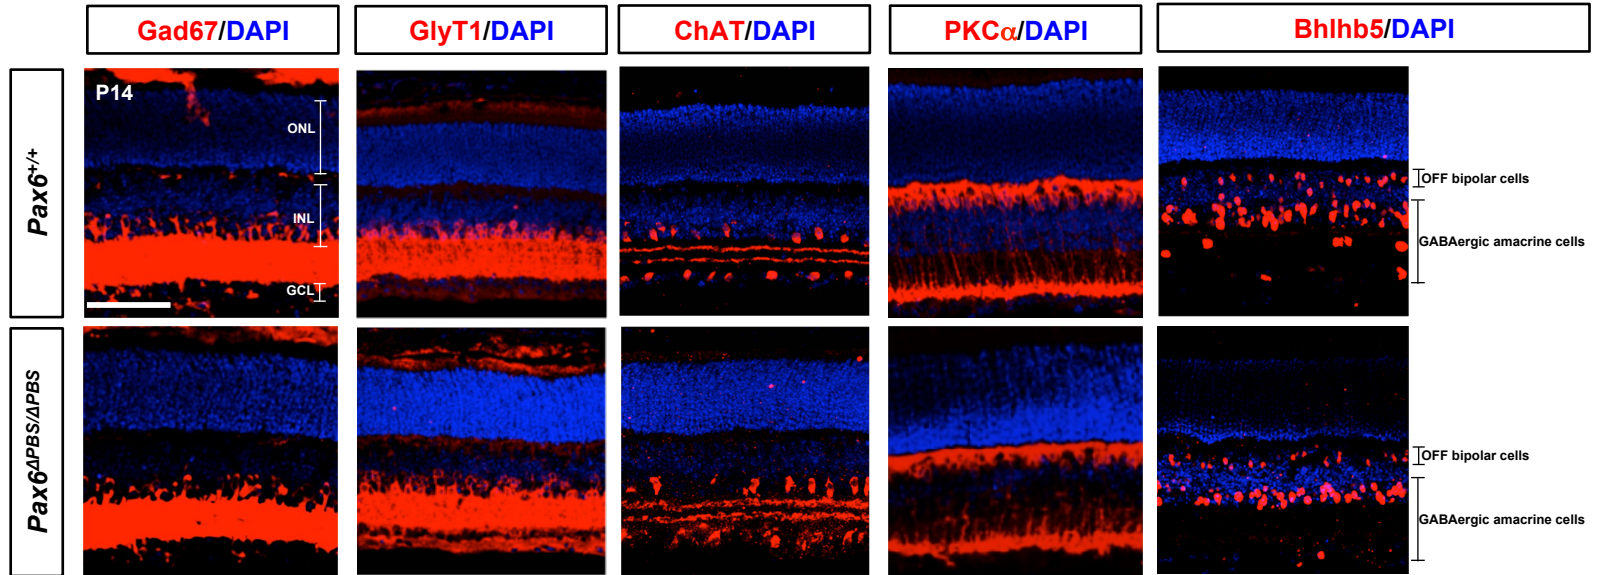

Supplement: supp [file elife-21303-supp-v1.zip]

A

Visual detection task

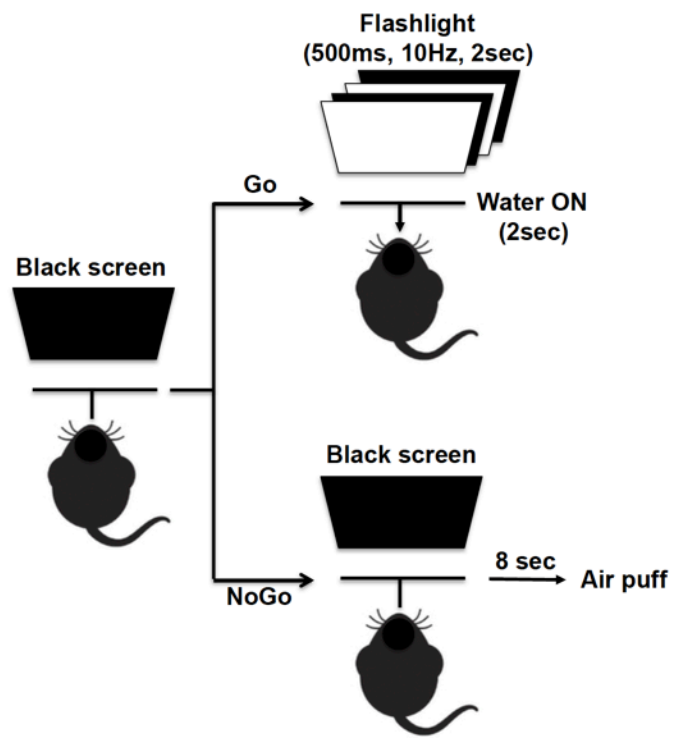

B

Learning Curve

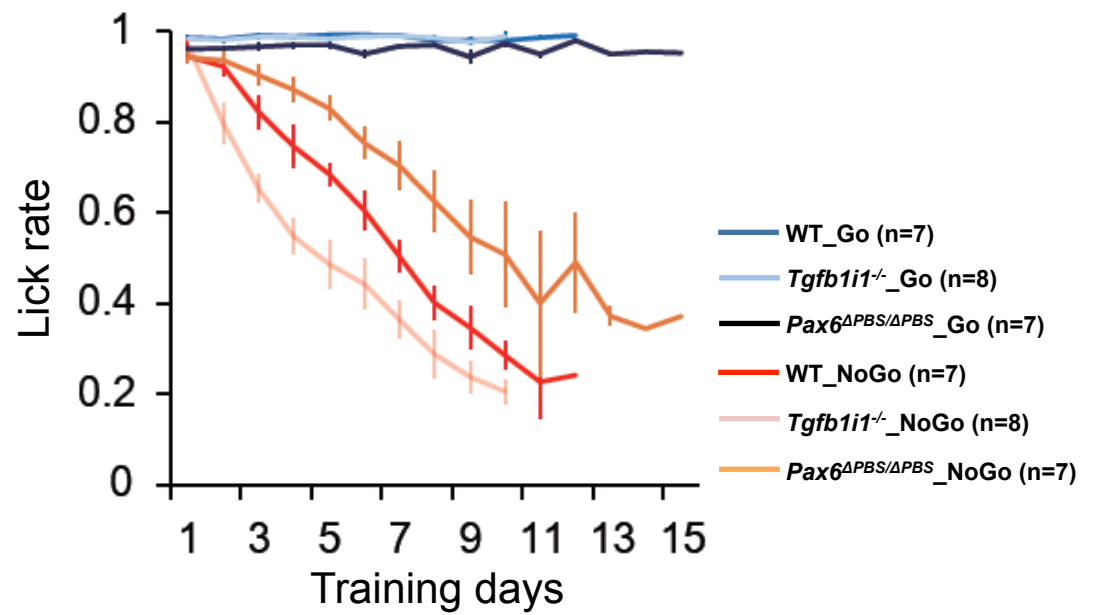

C

Visual adaptation task

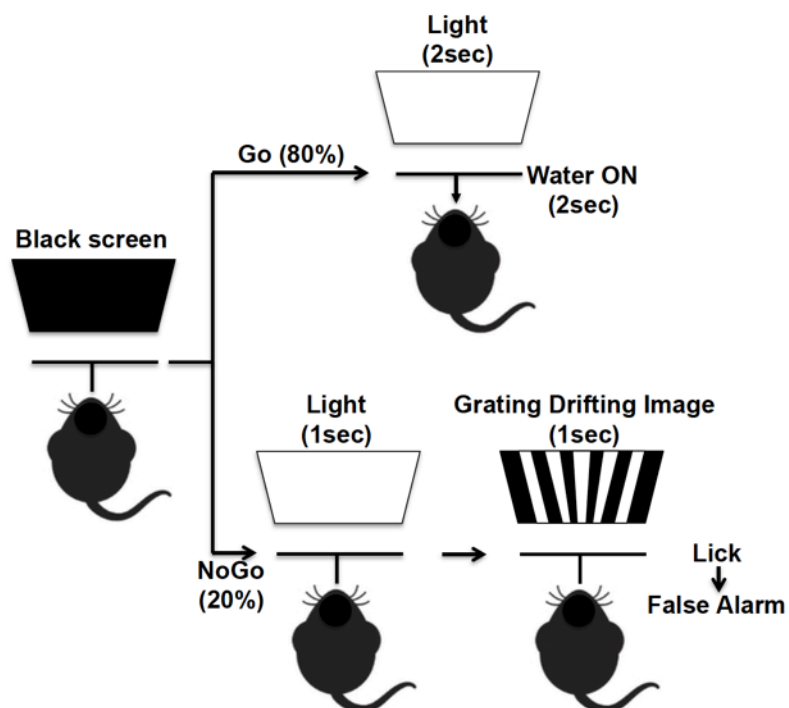

D

Learning curve

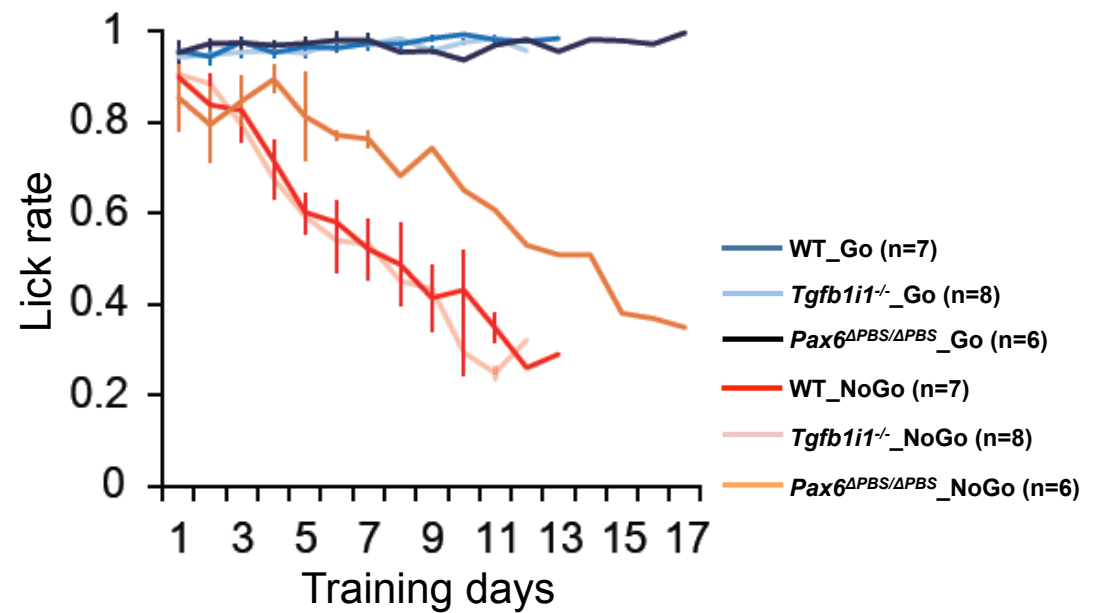

Supplement: supp [file elife-21303-supp-v1.zip]

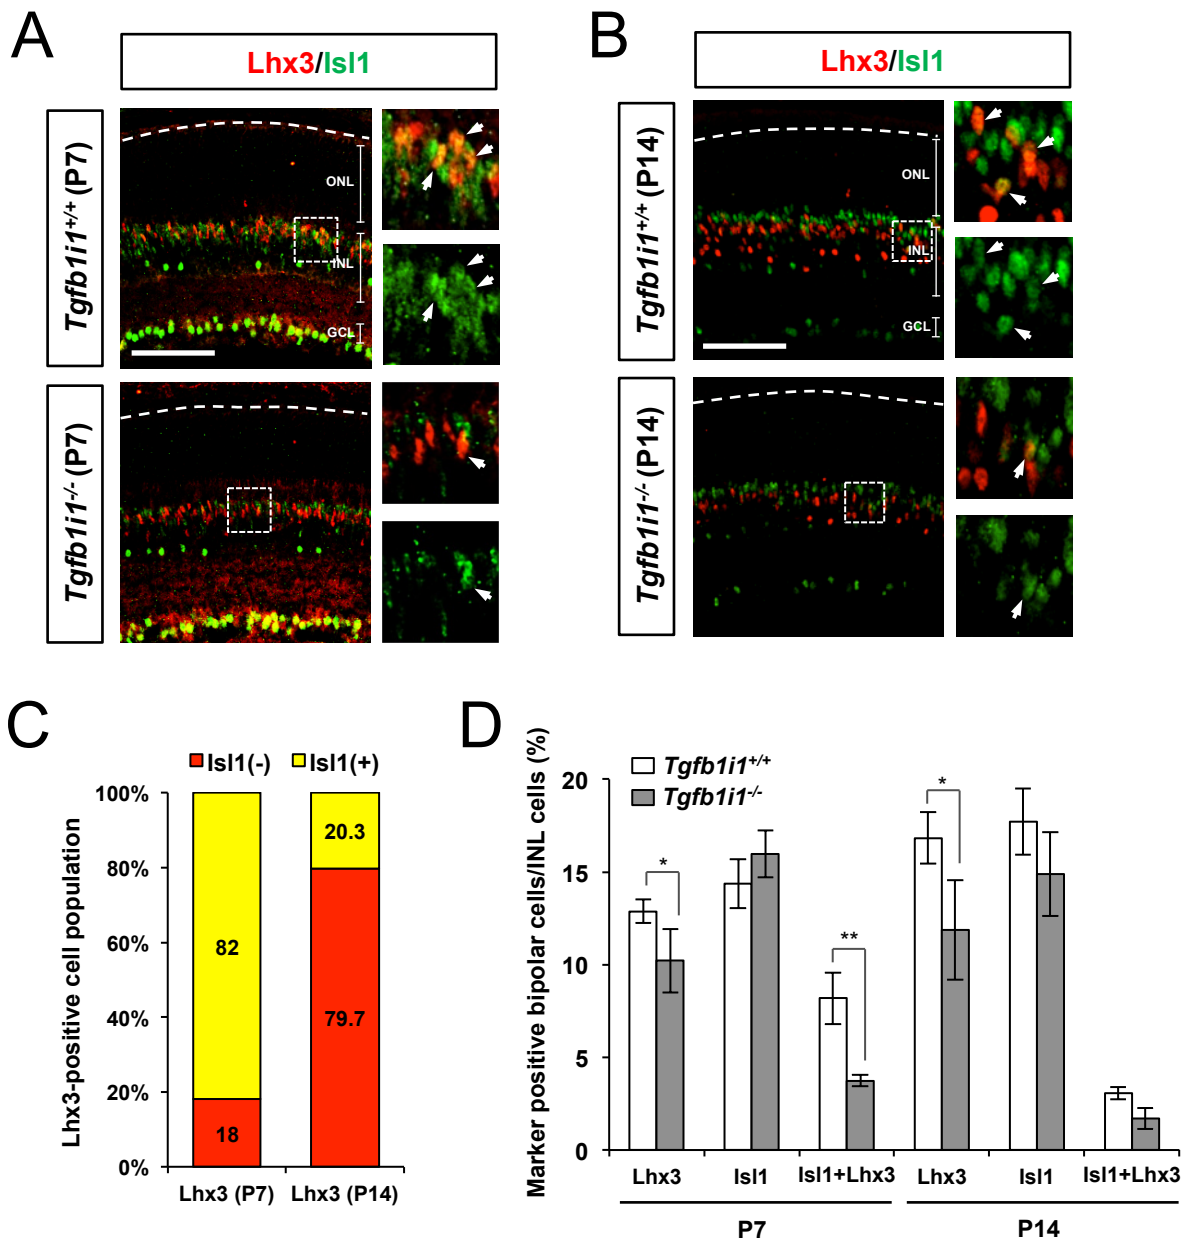

Supplement: supp [file elife-21303-supp-v1.zip]

A

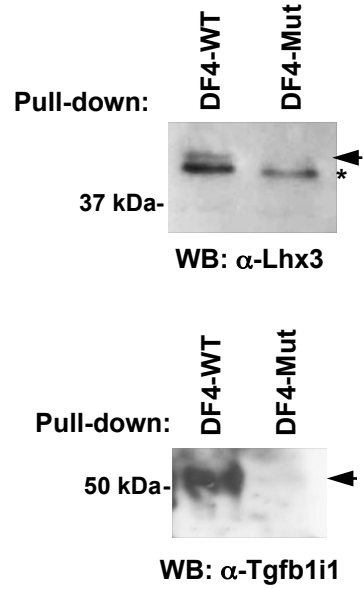

B

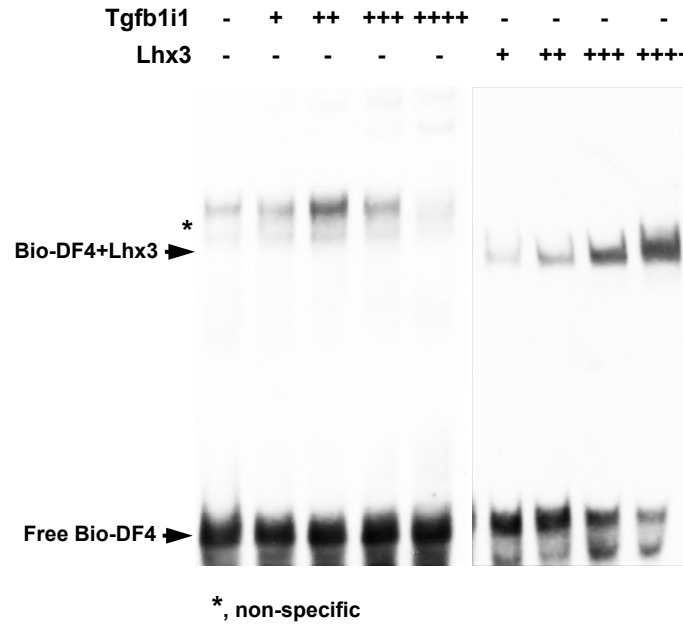

C

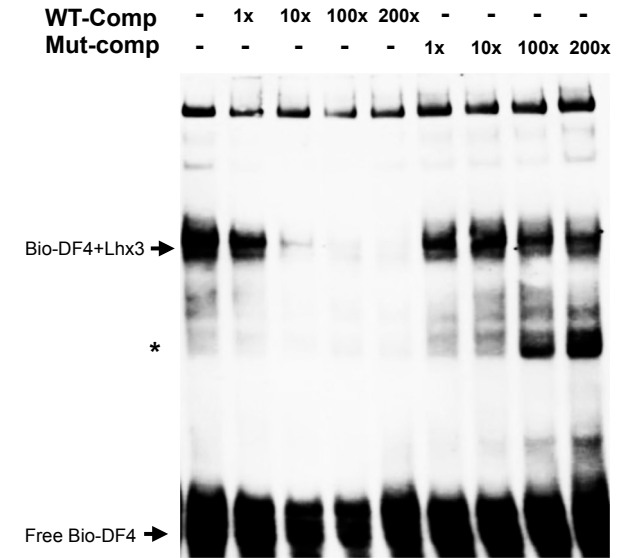

Supplement: supp [file elife-21303-supp-v1.zip]

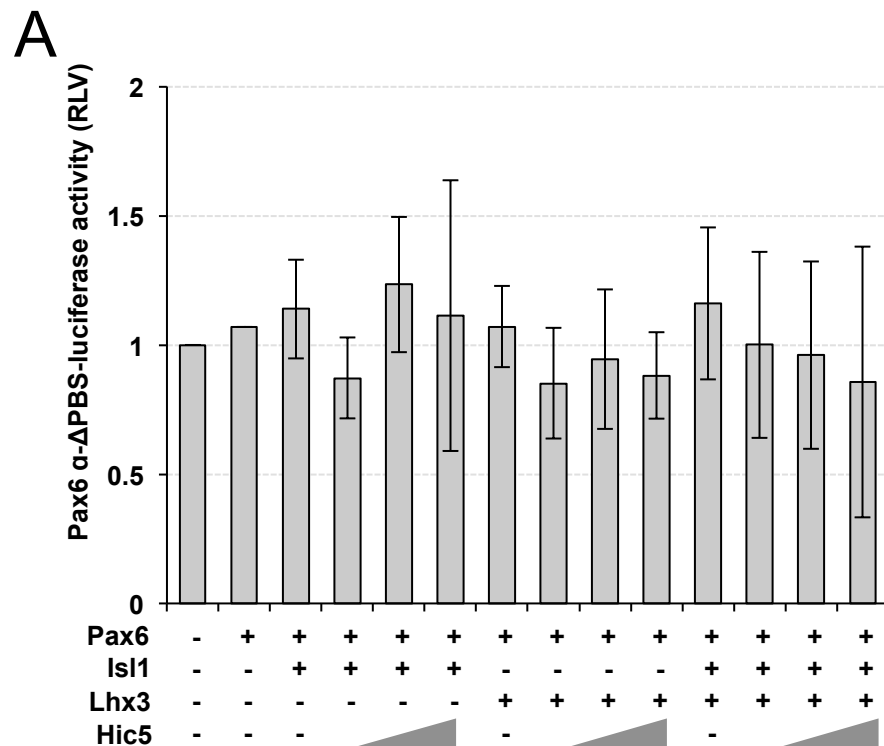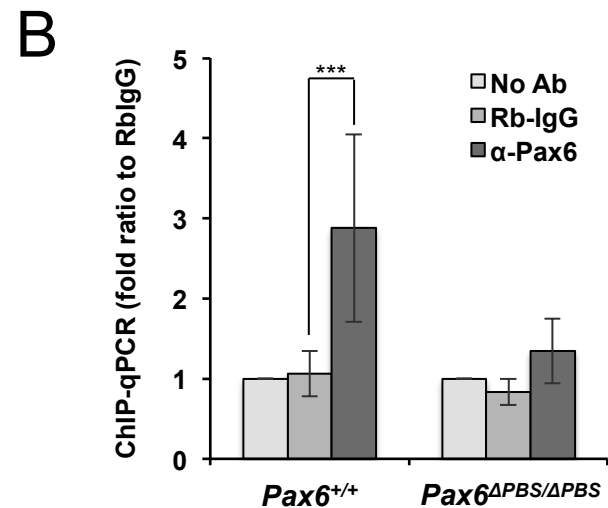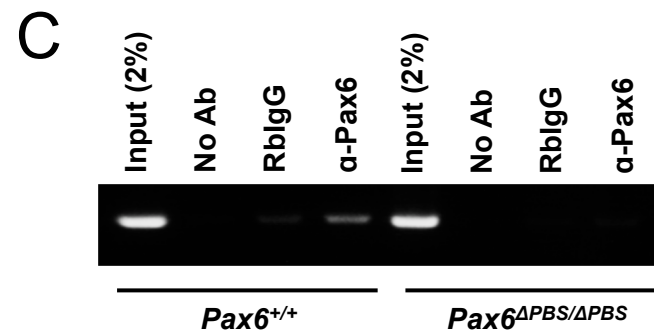

Supplement: supp [file elife-21303-supp-v1.zip]

A

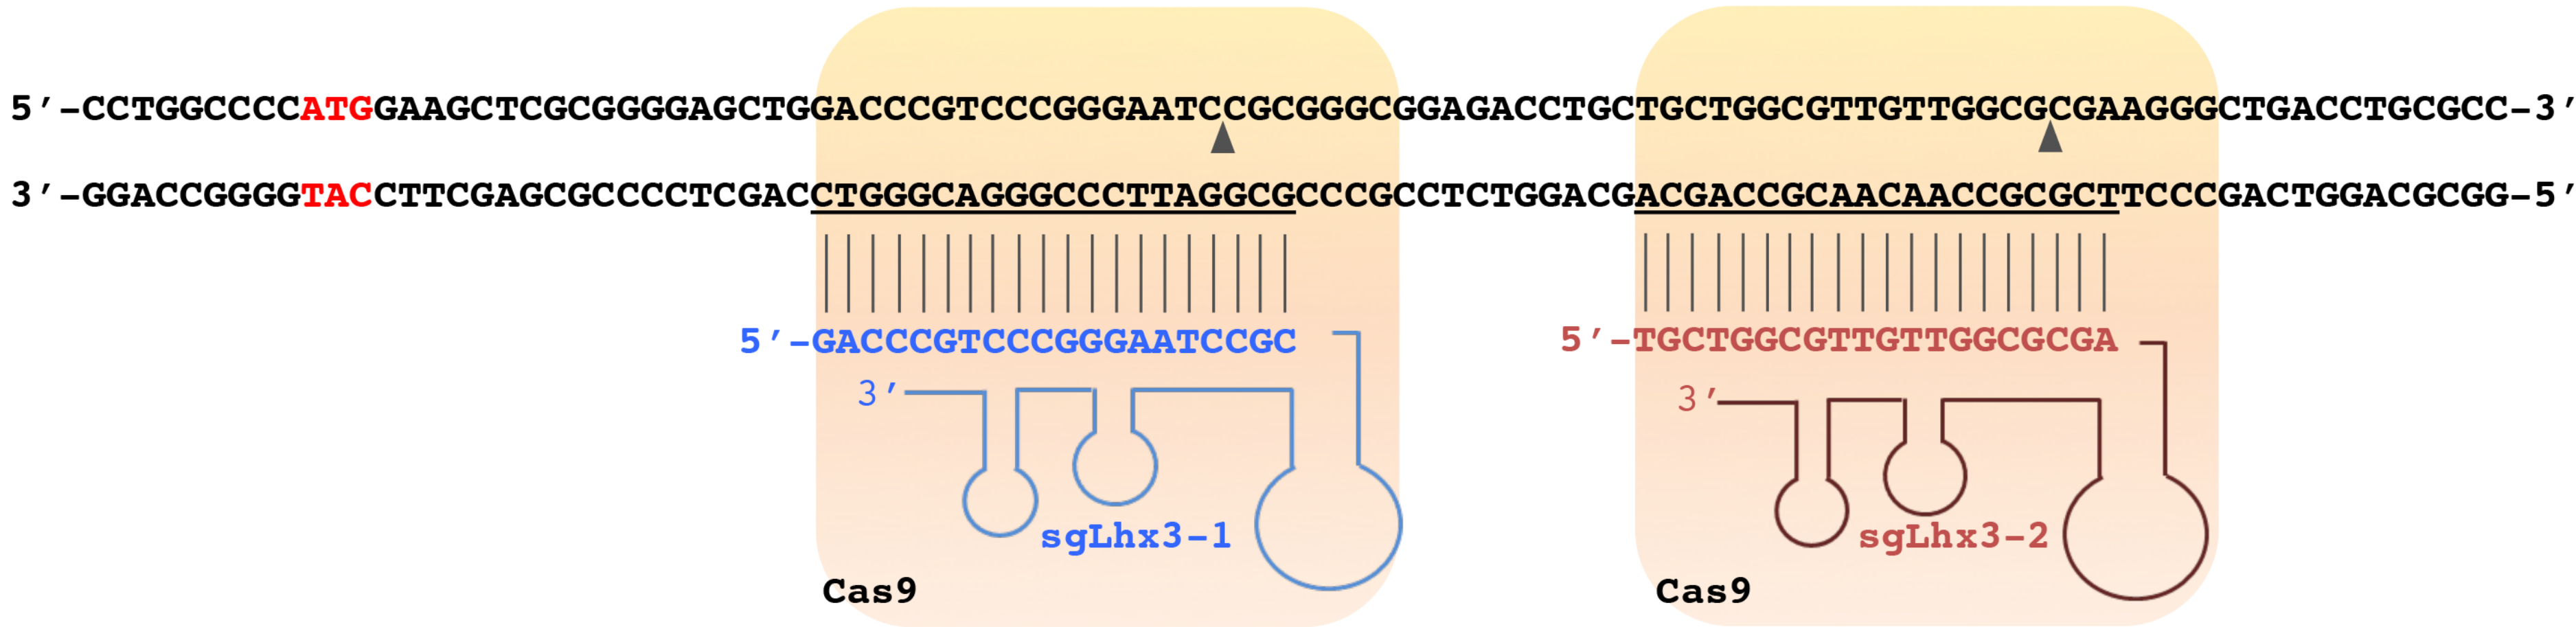

B

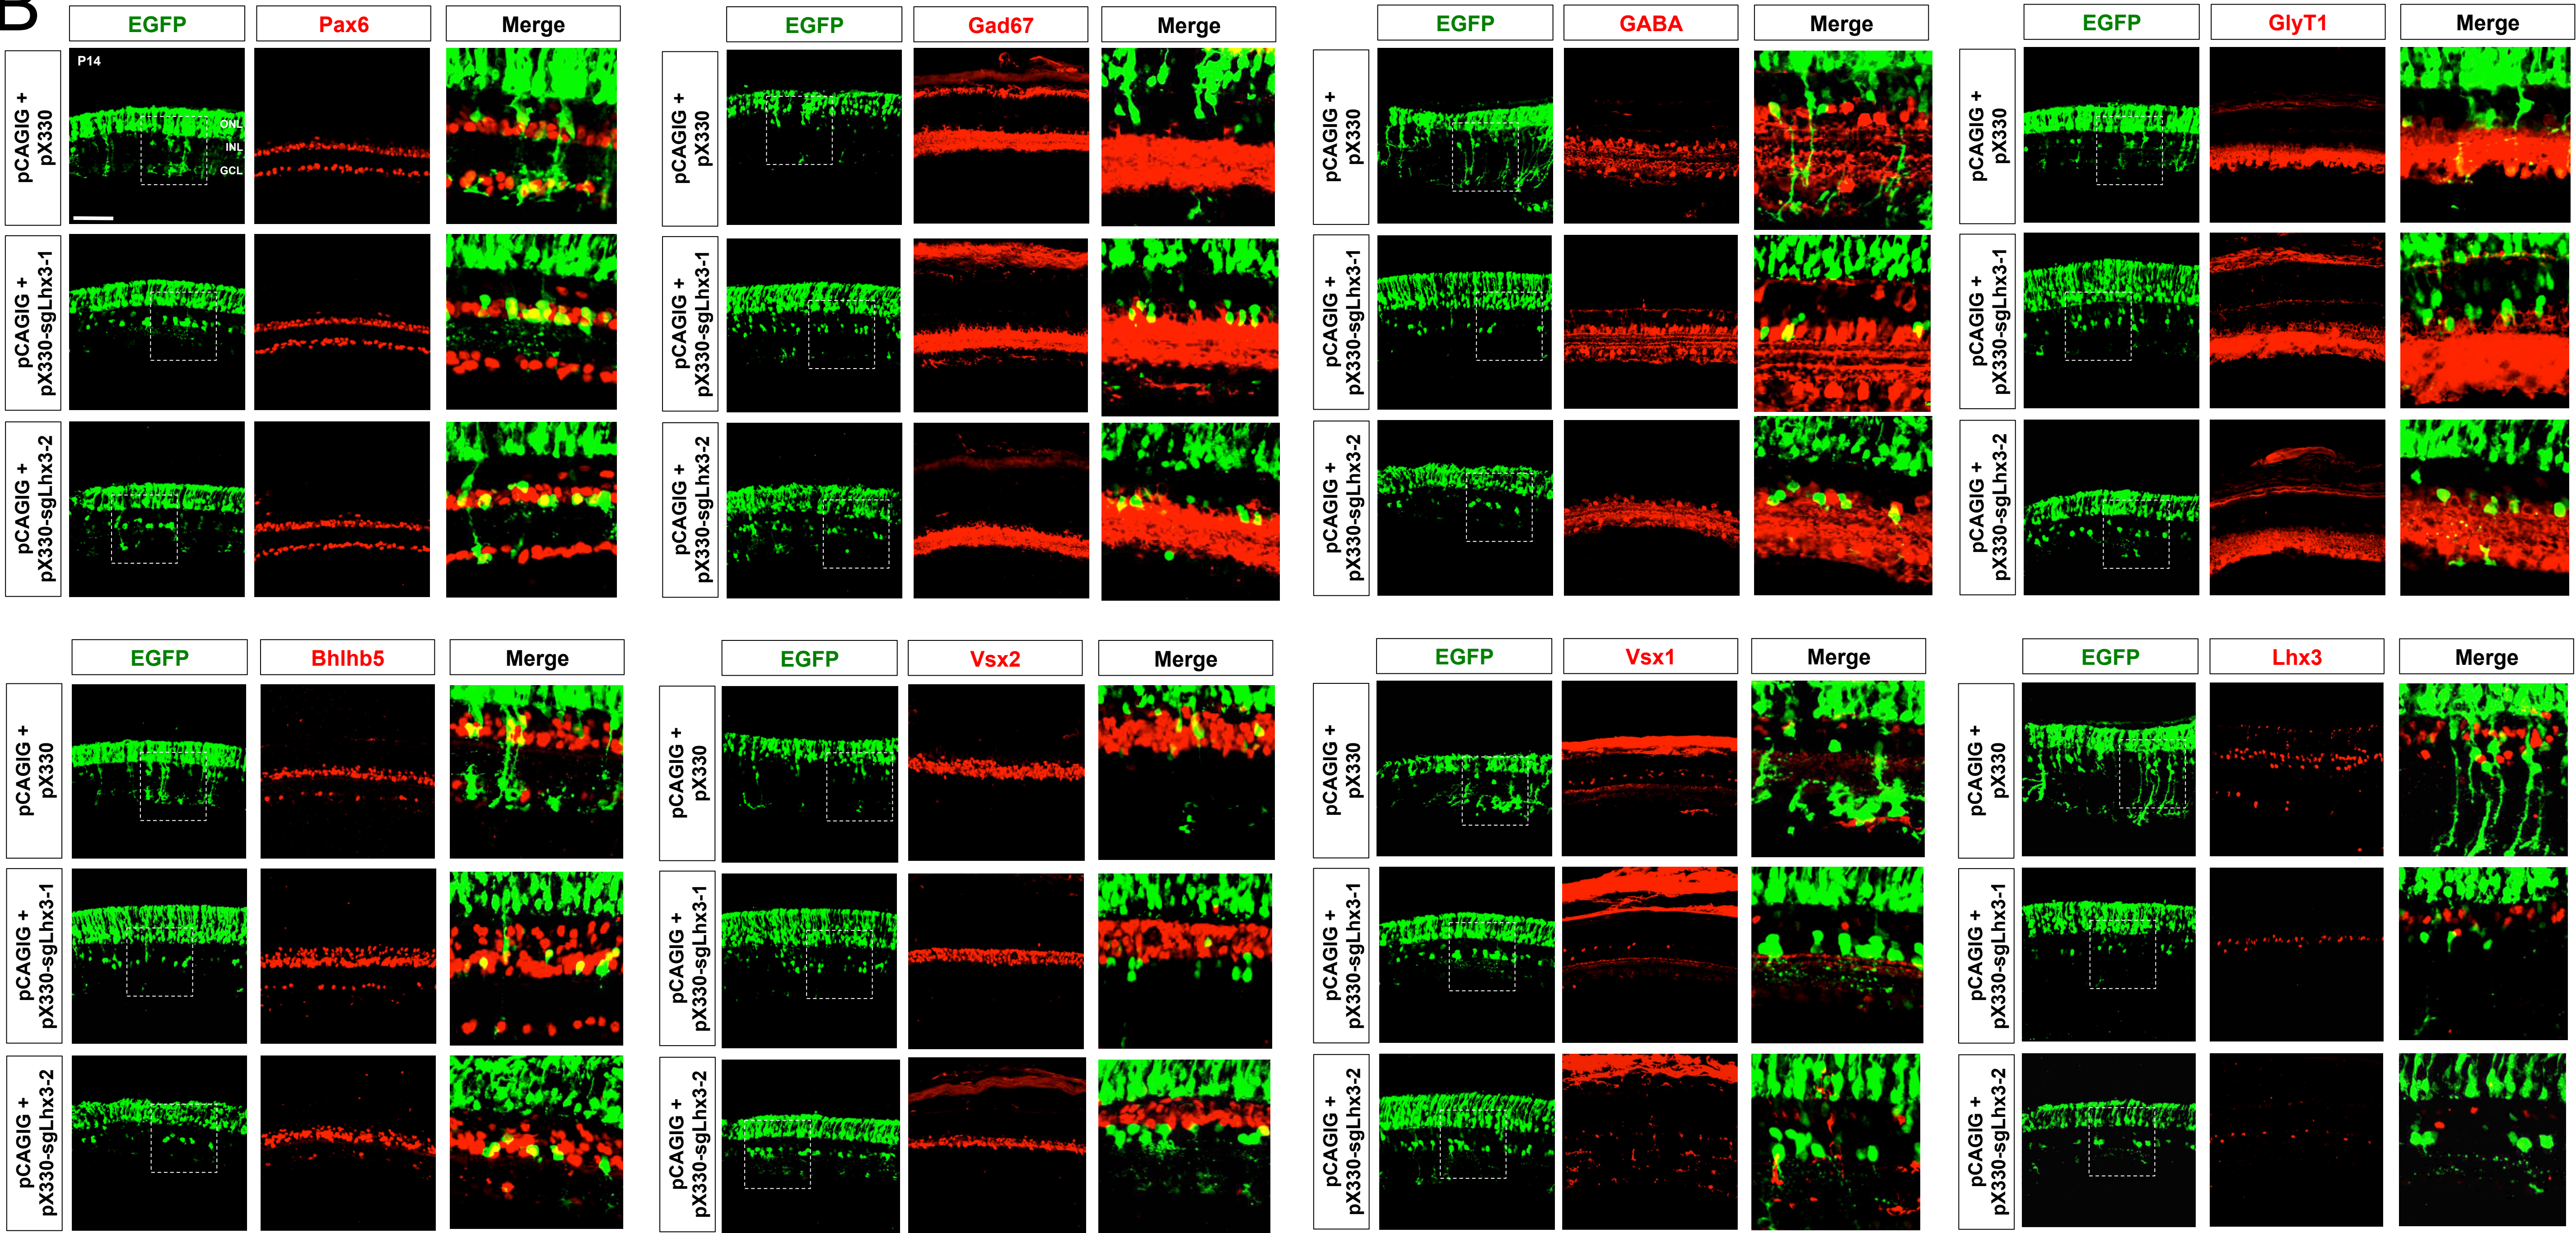

C

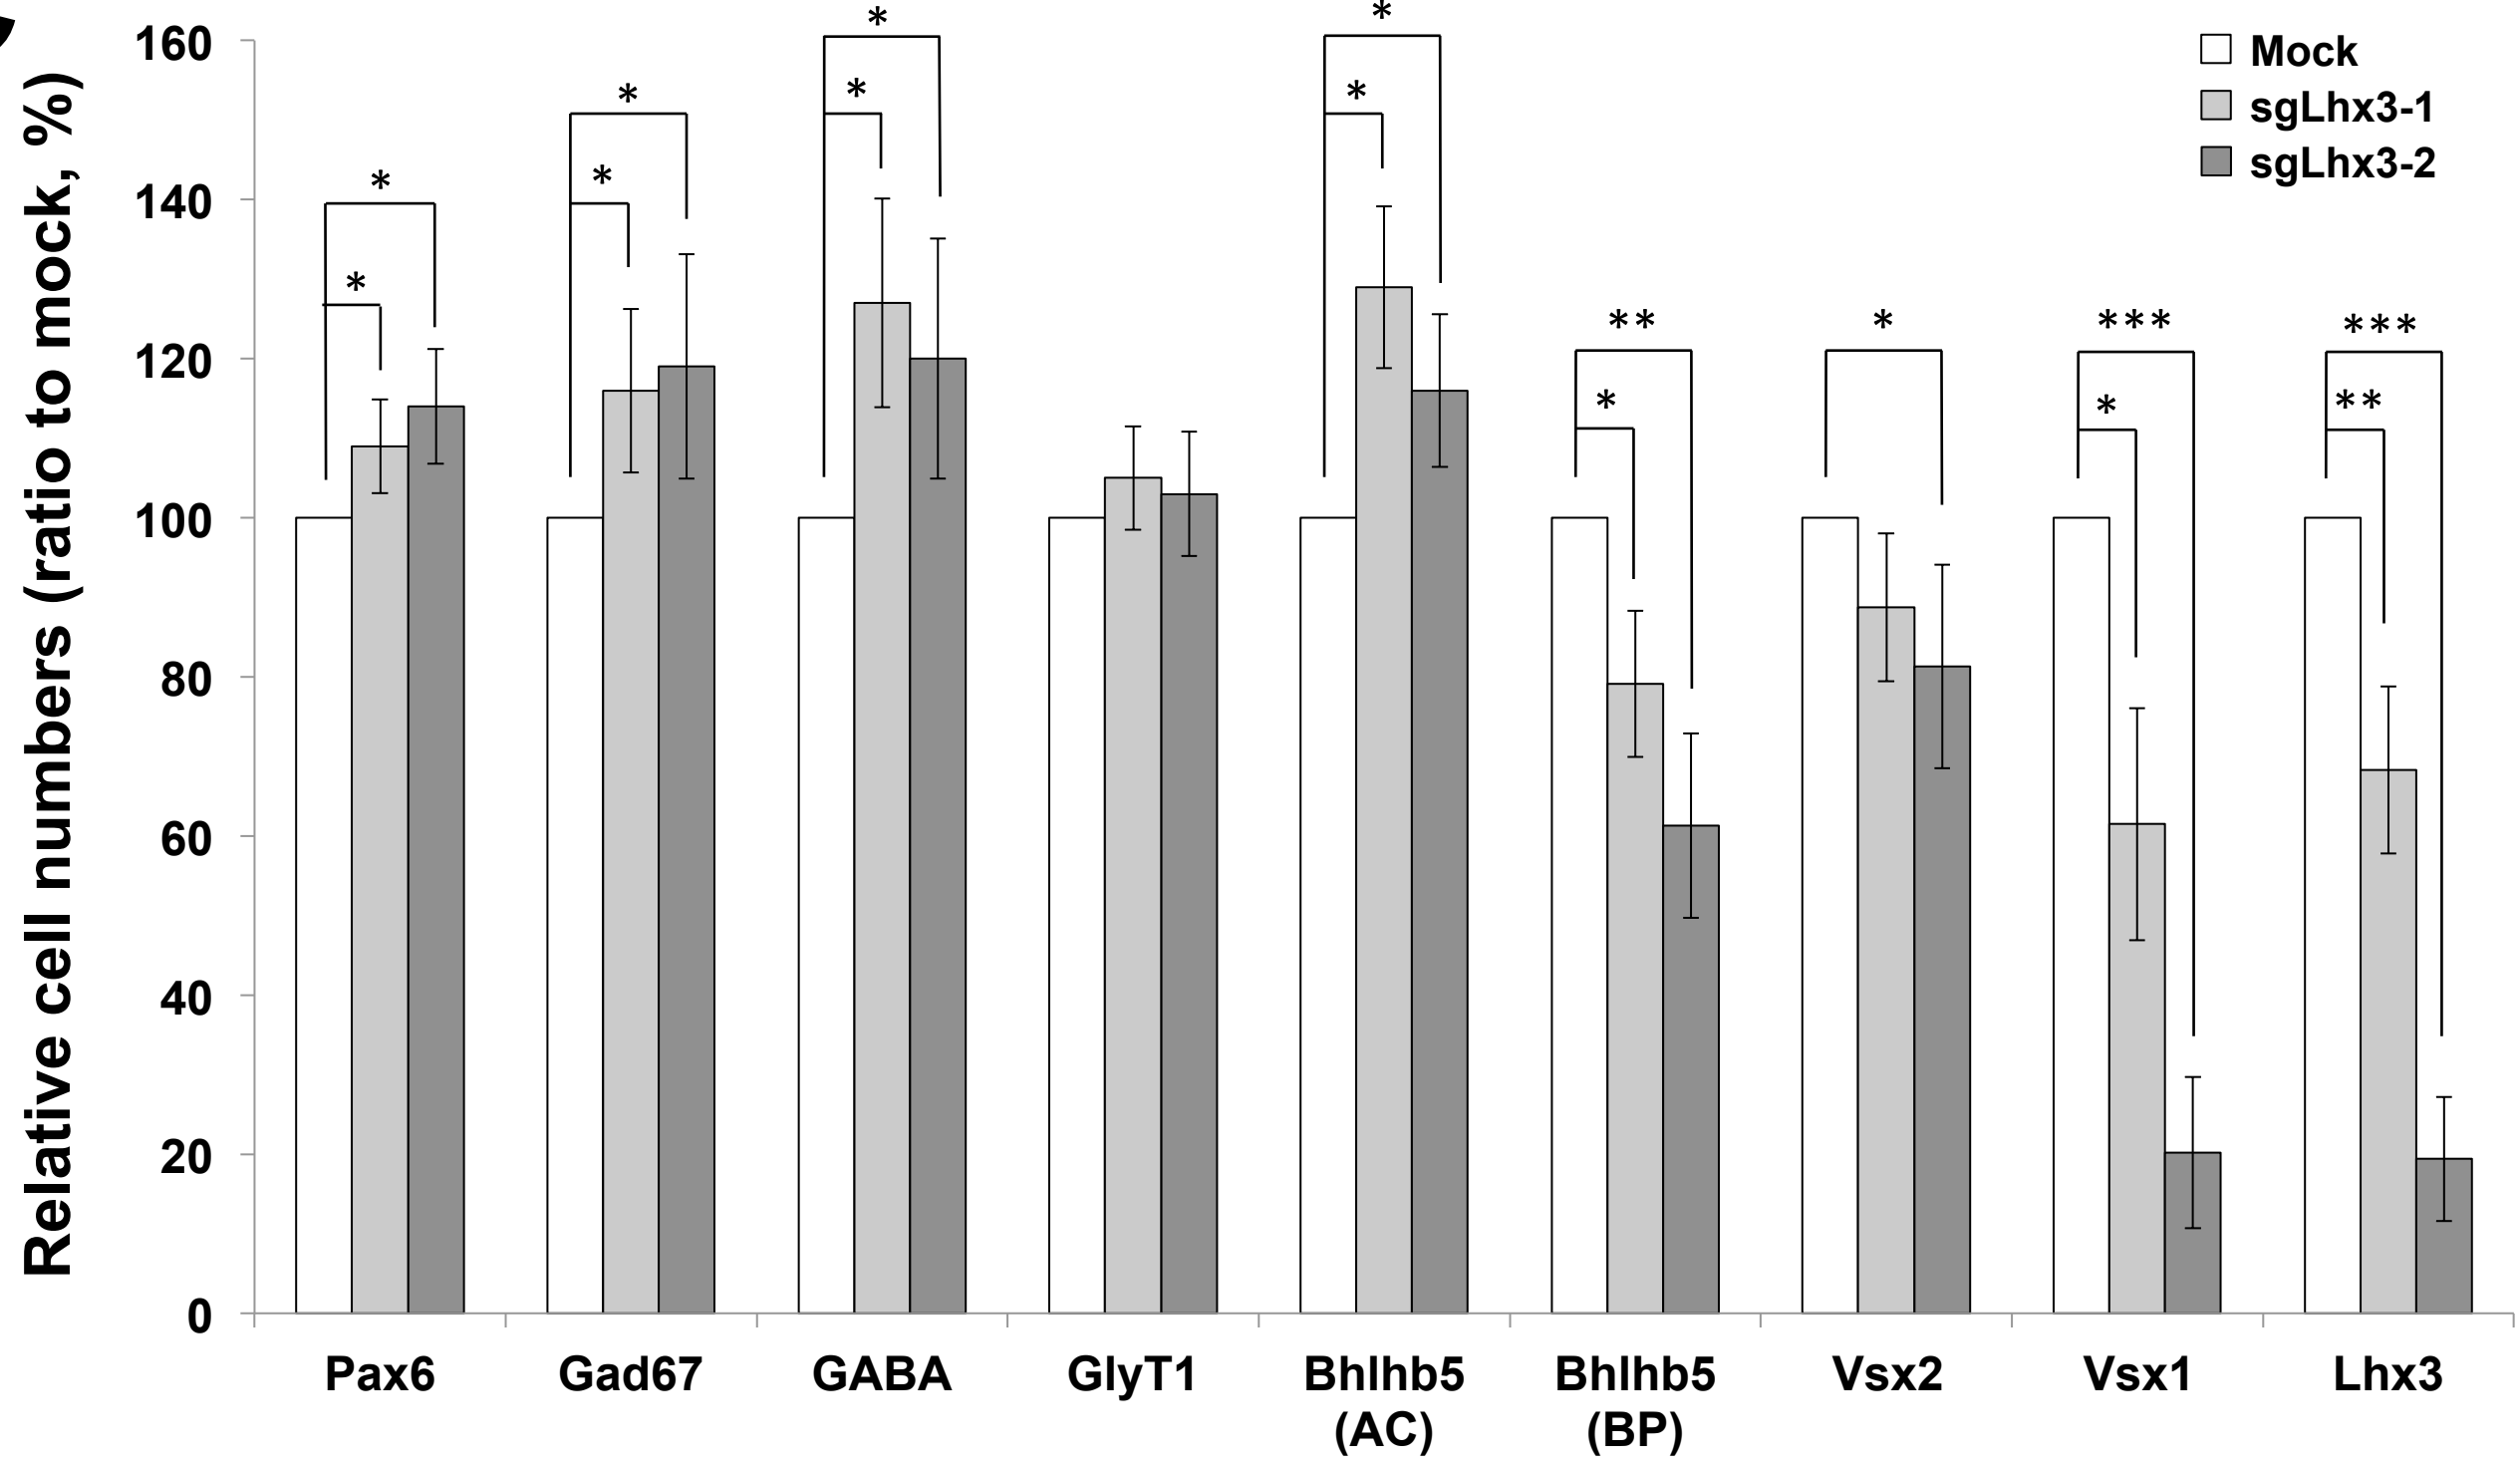

D

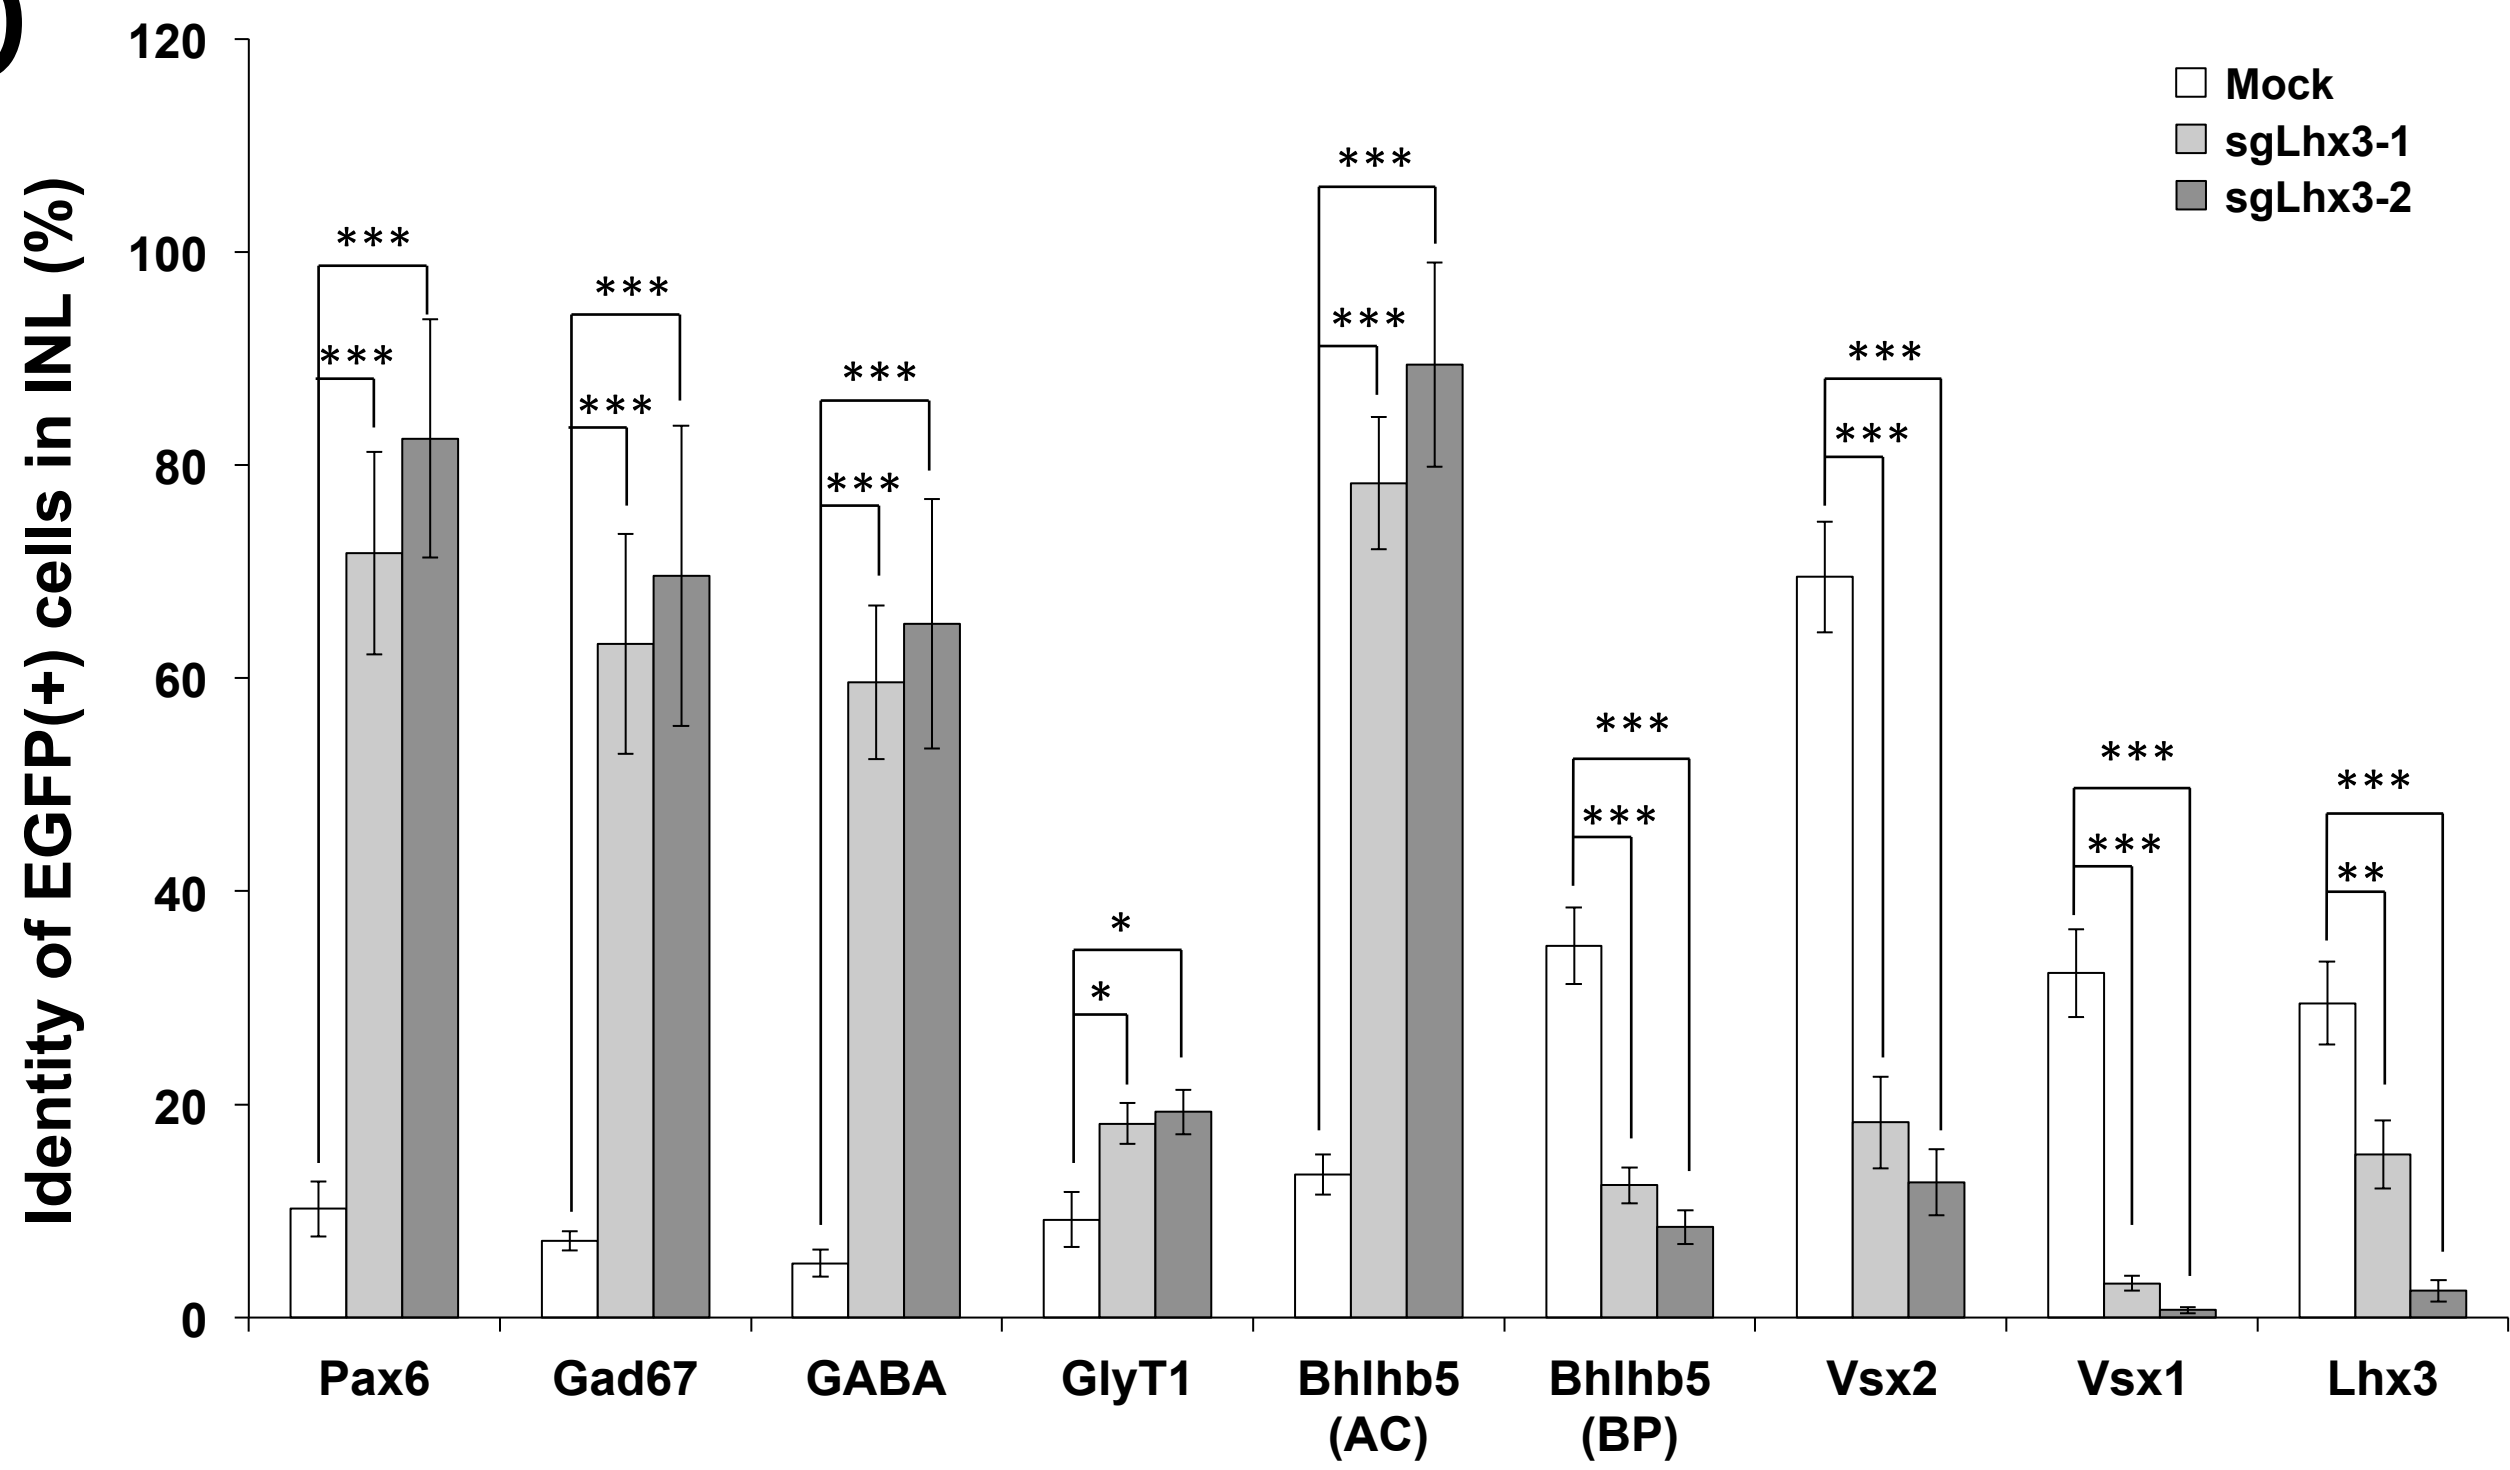

Supplement: supp [file elife-21303-supp-v1.zip]

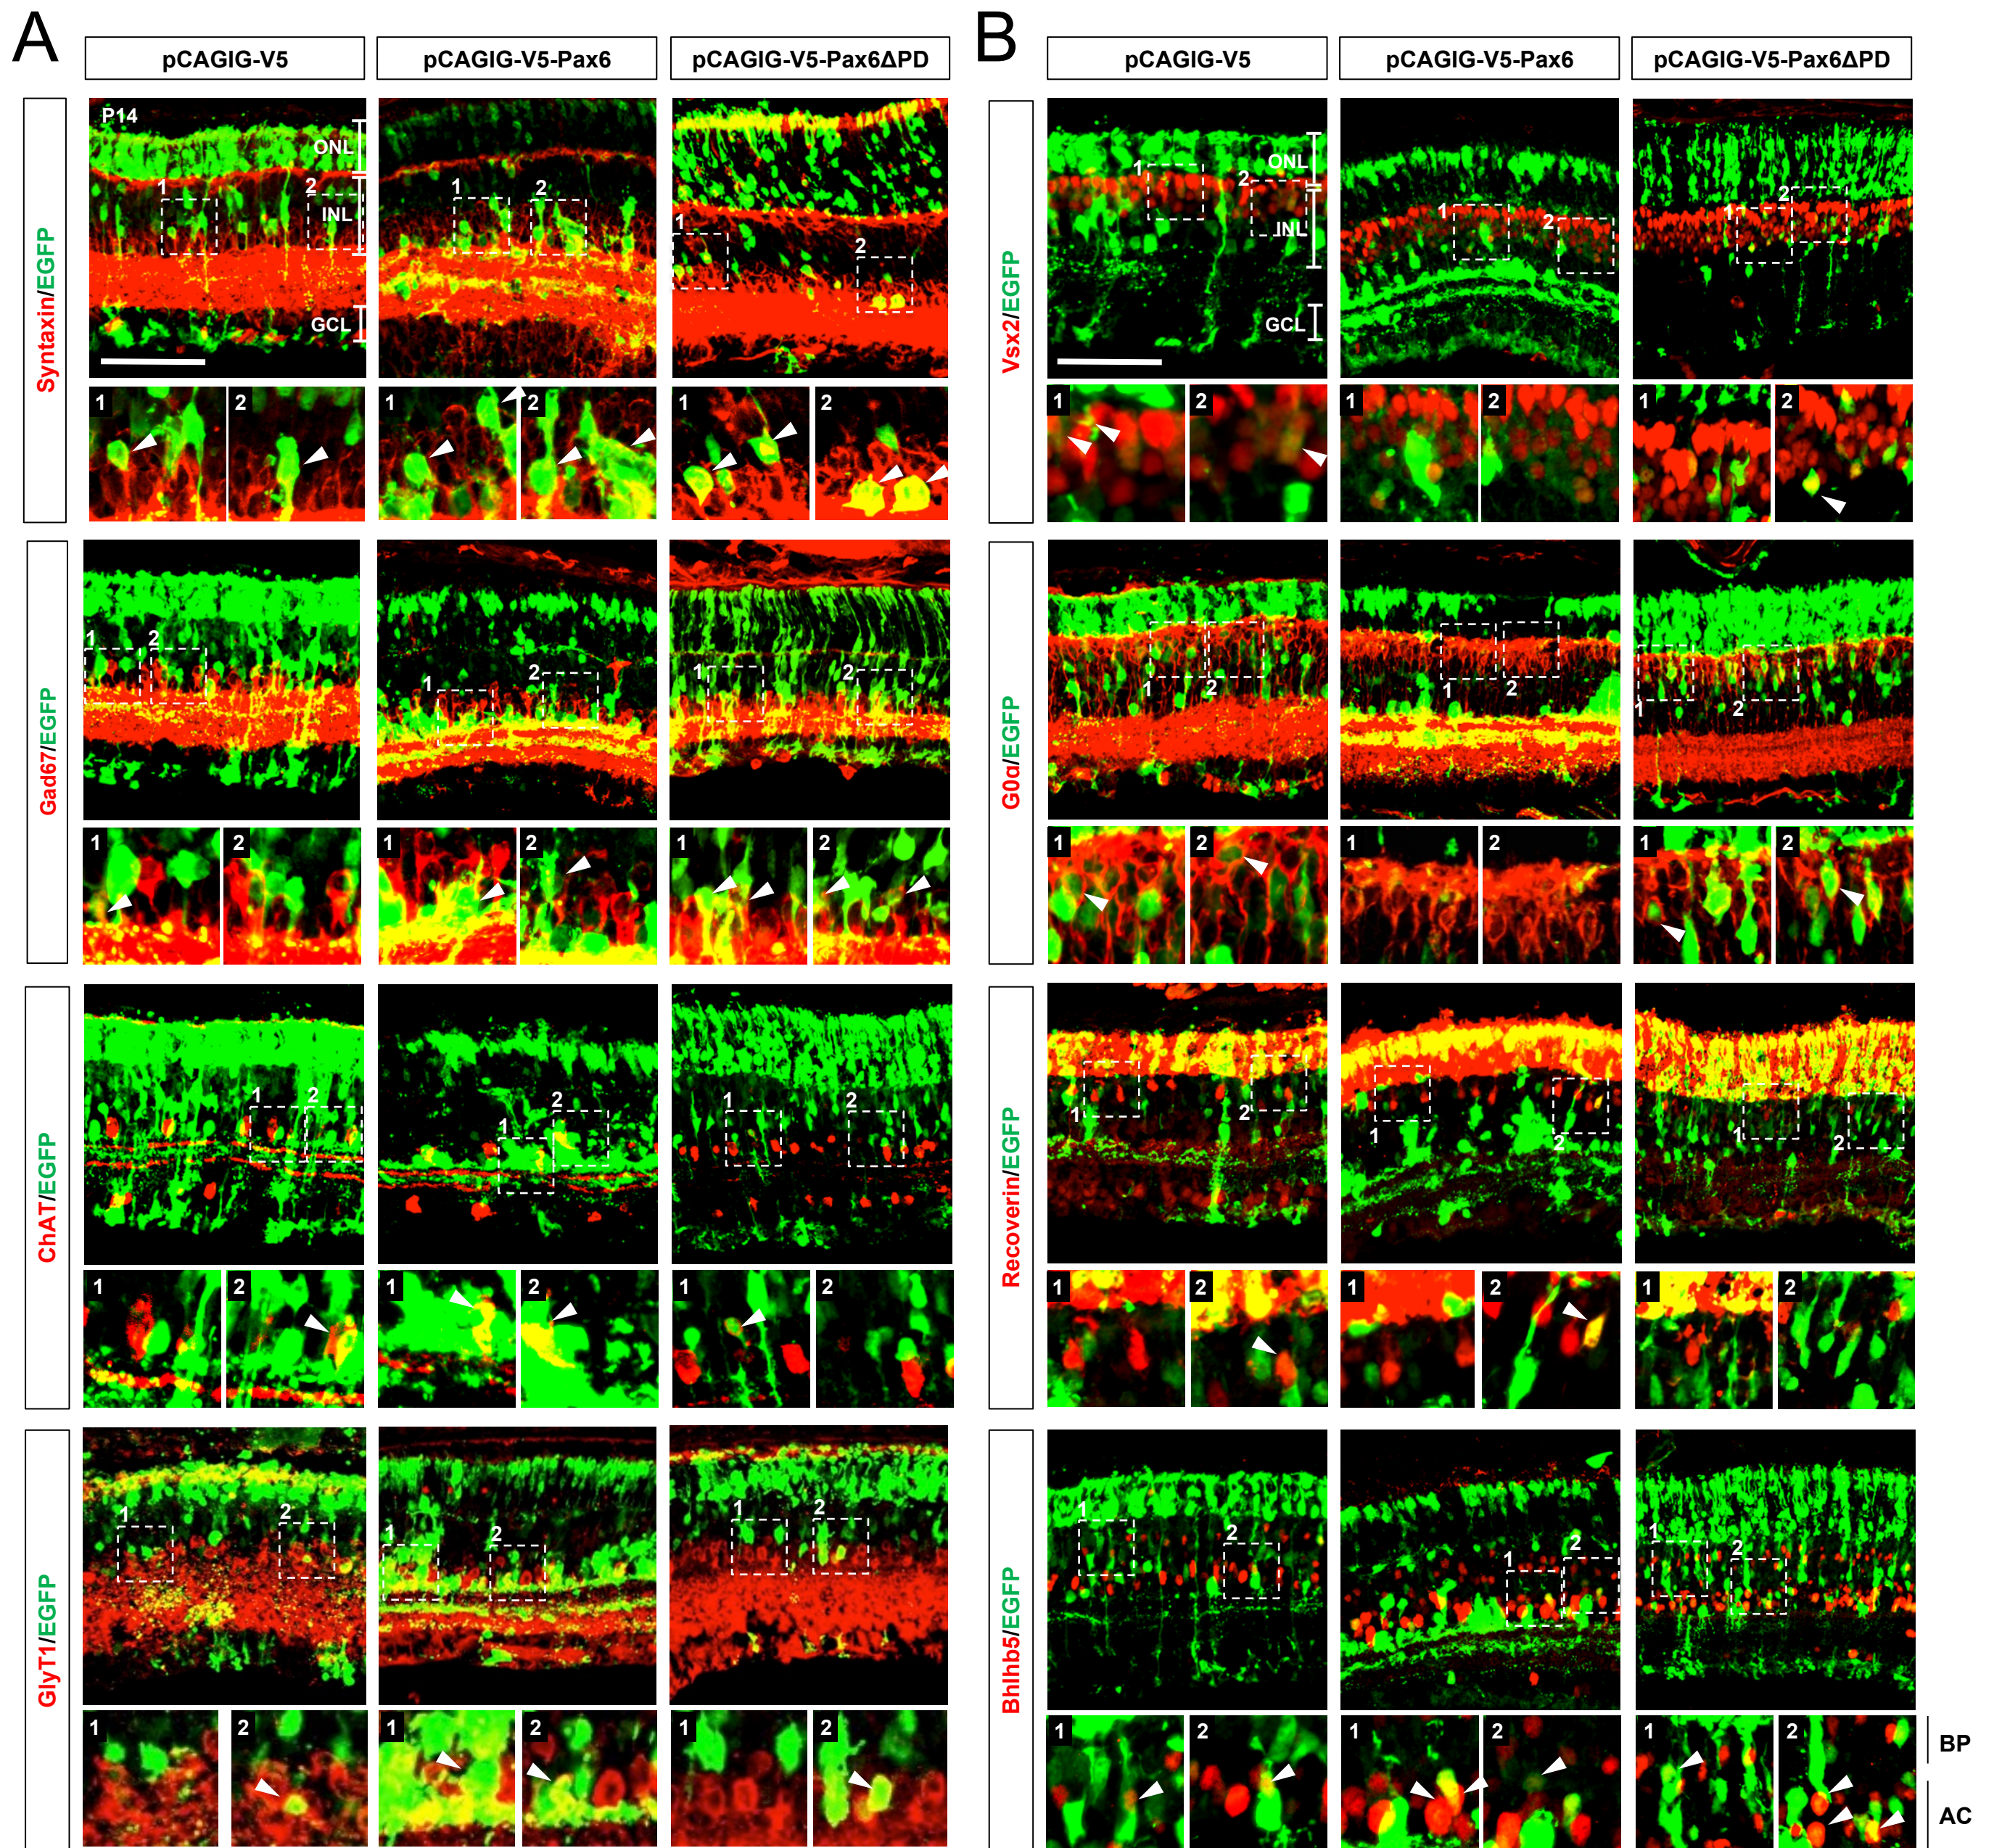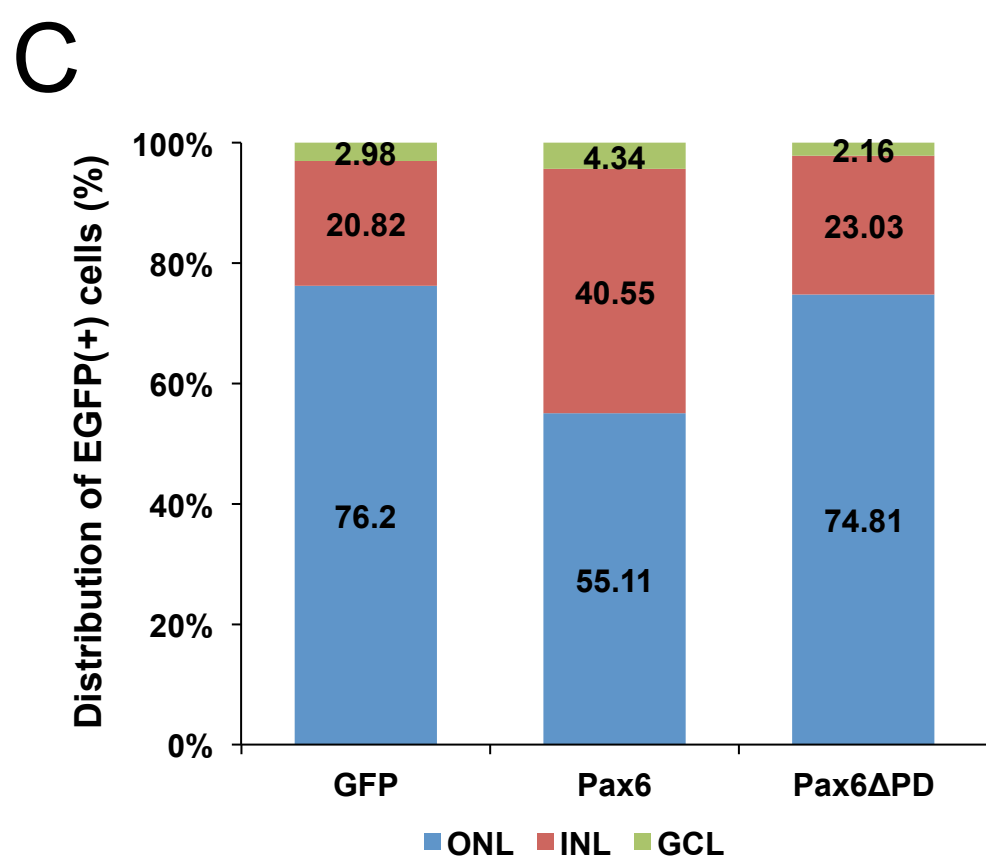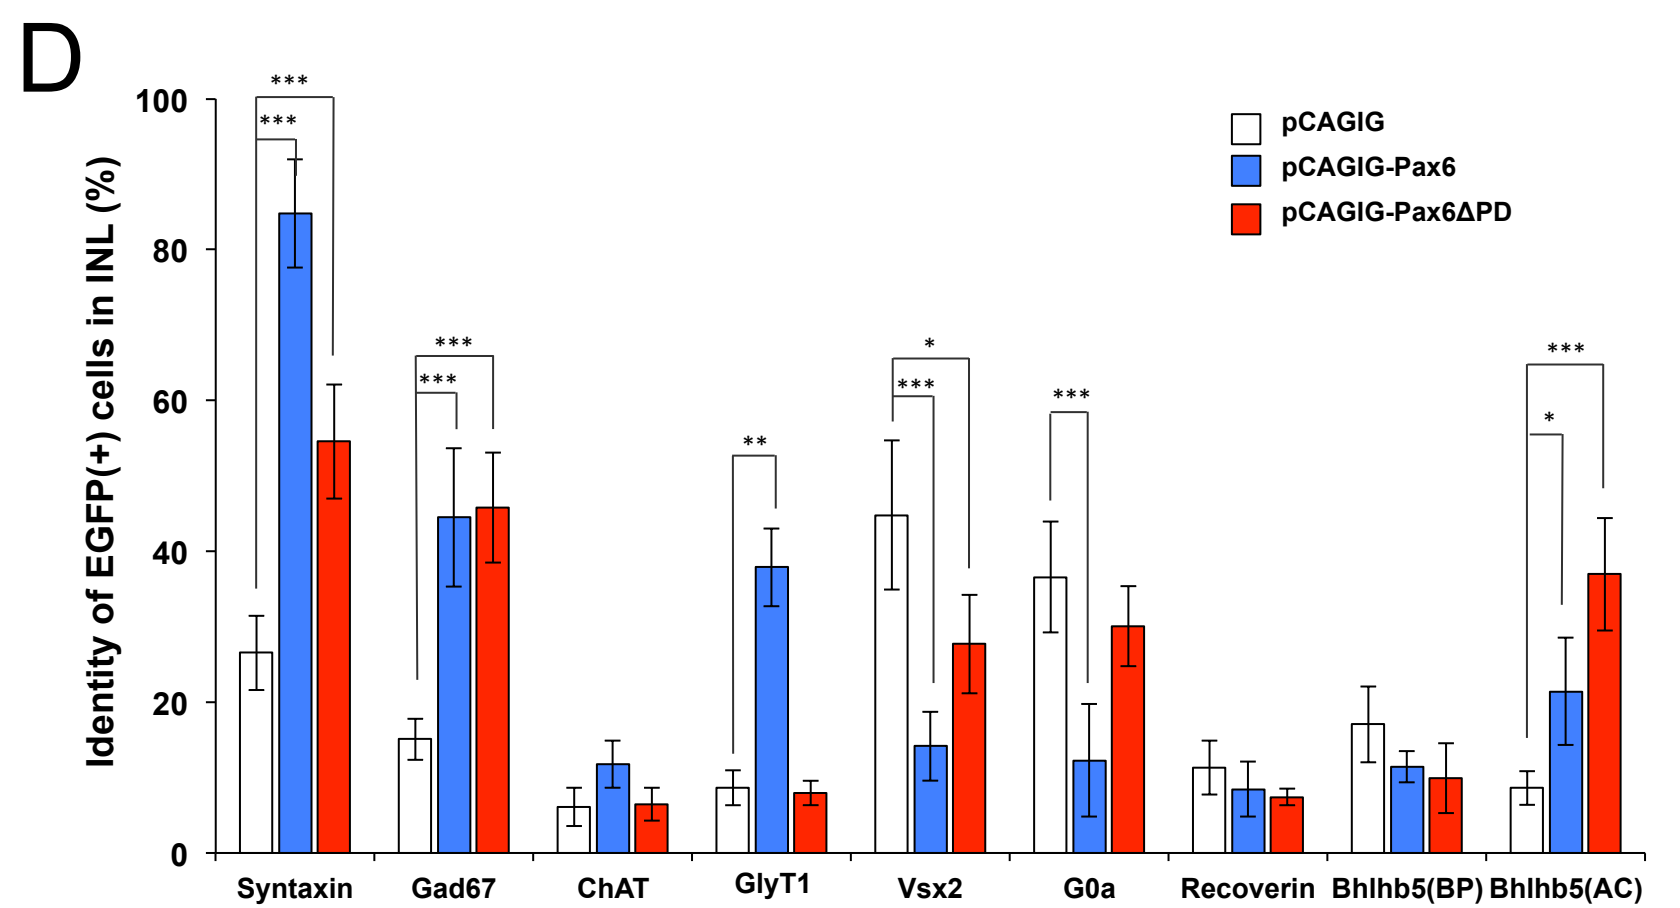

Supplement: supp [file elife-21303-supp-v1.zip]

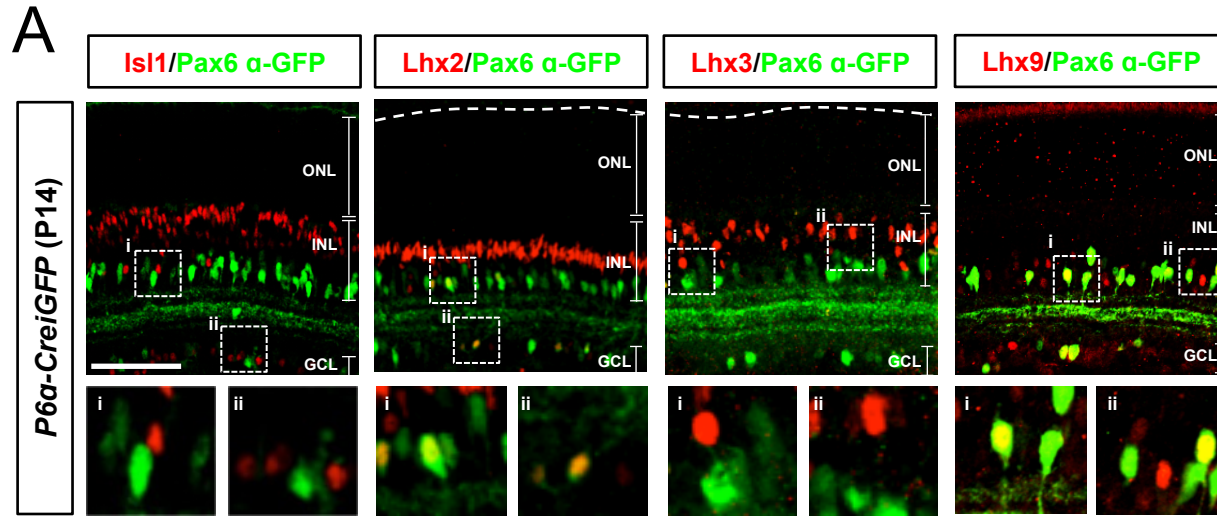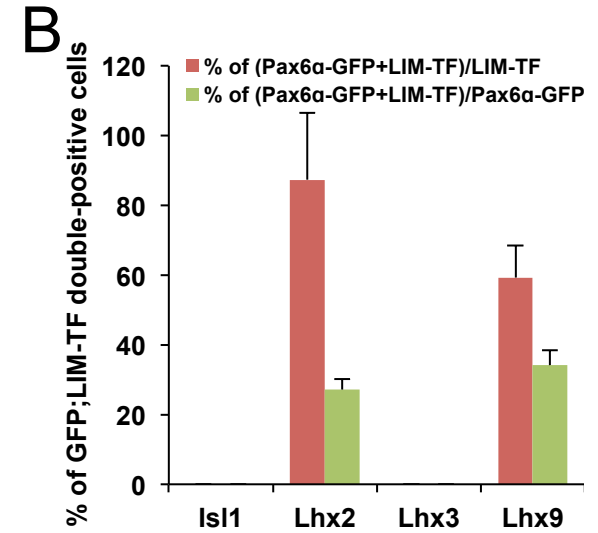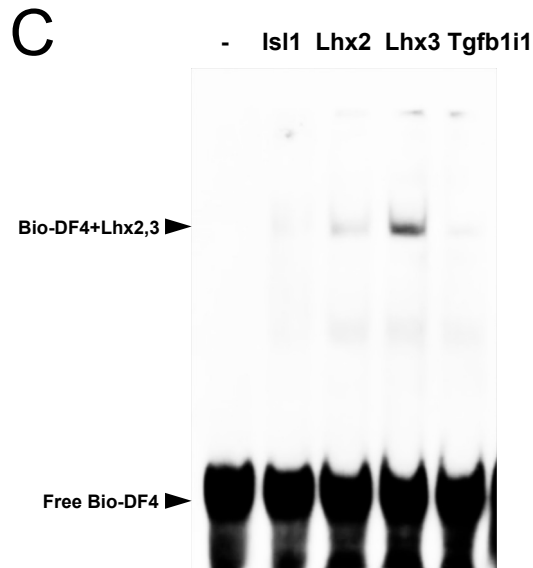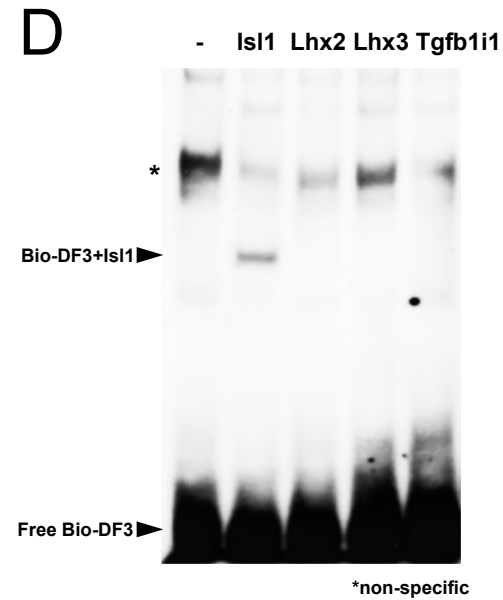

Supplement: supp [file elife-21303-supp-v1.zip]

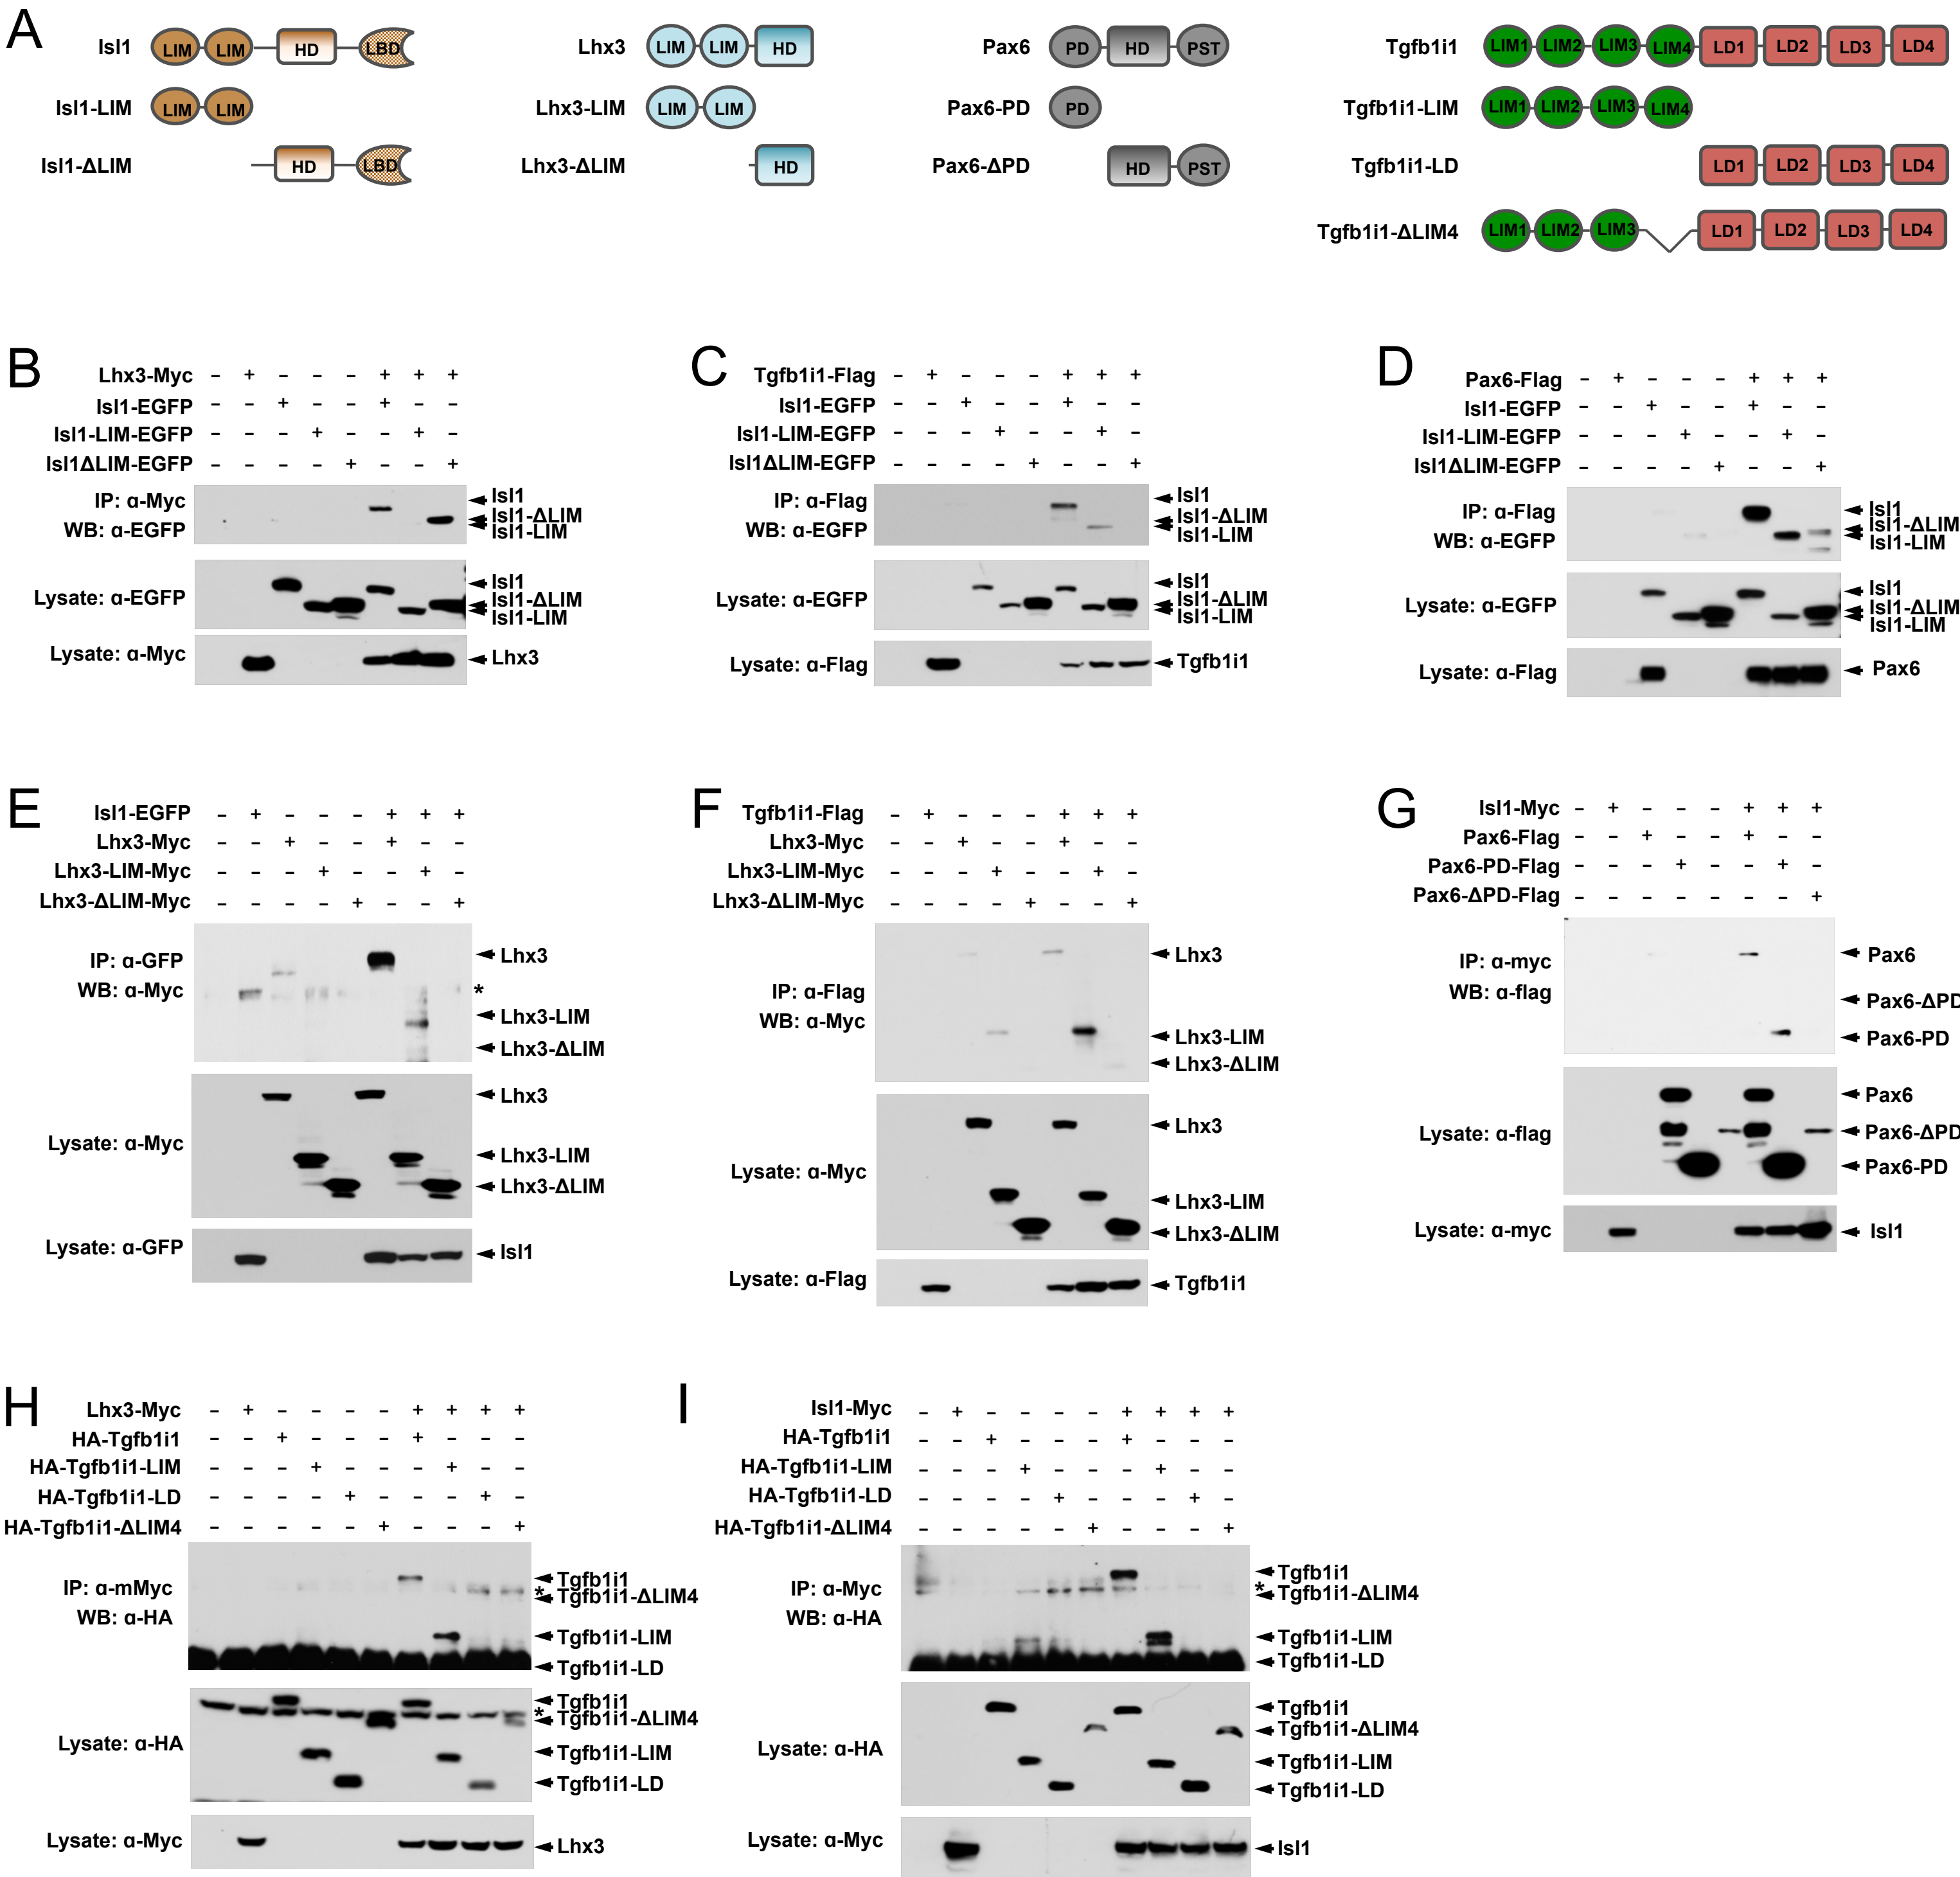

Supplement: supp [file elife-21303-supp-v1.zip]

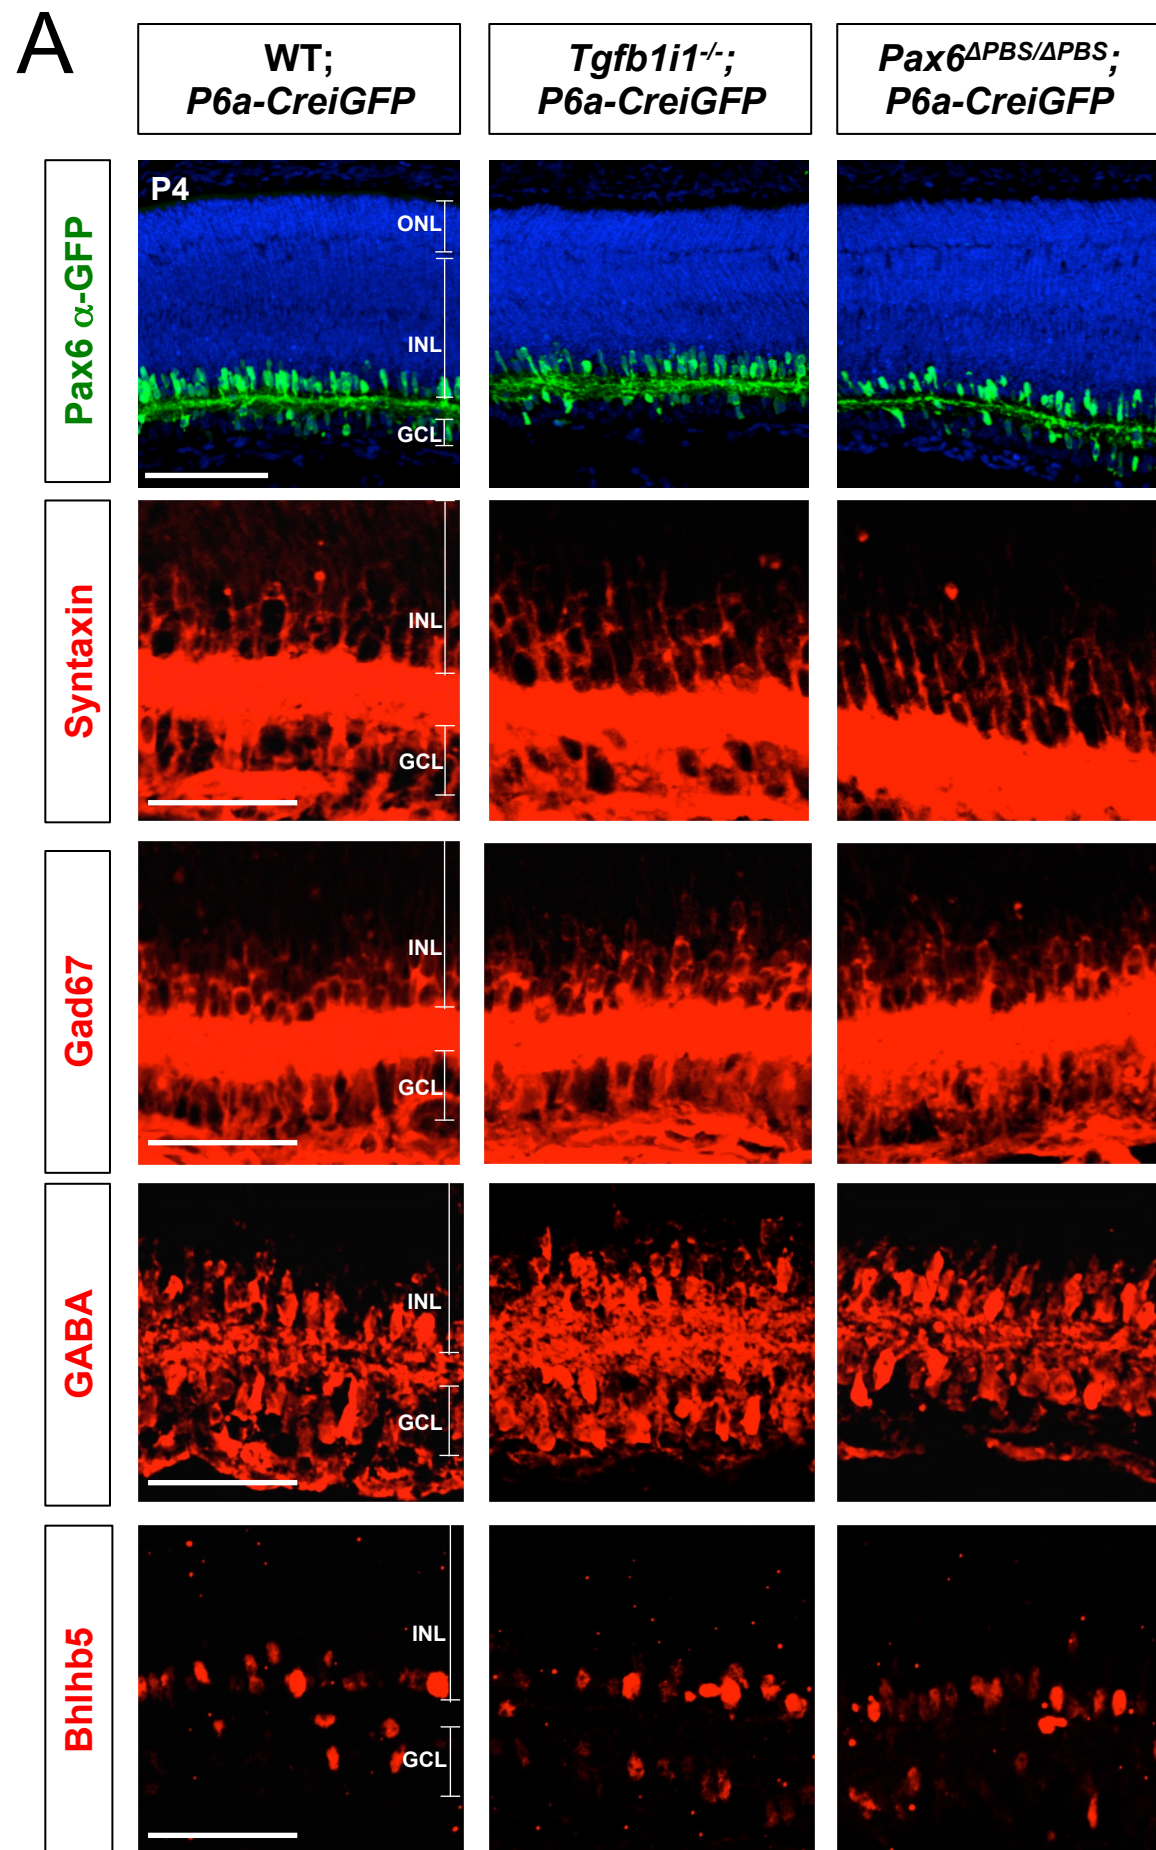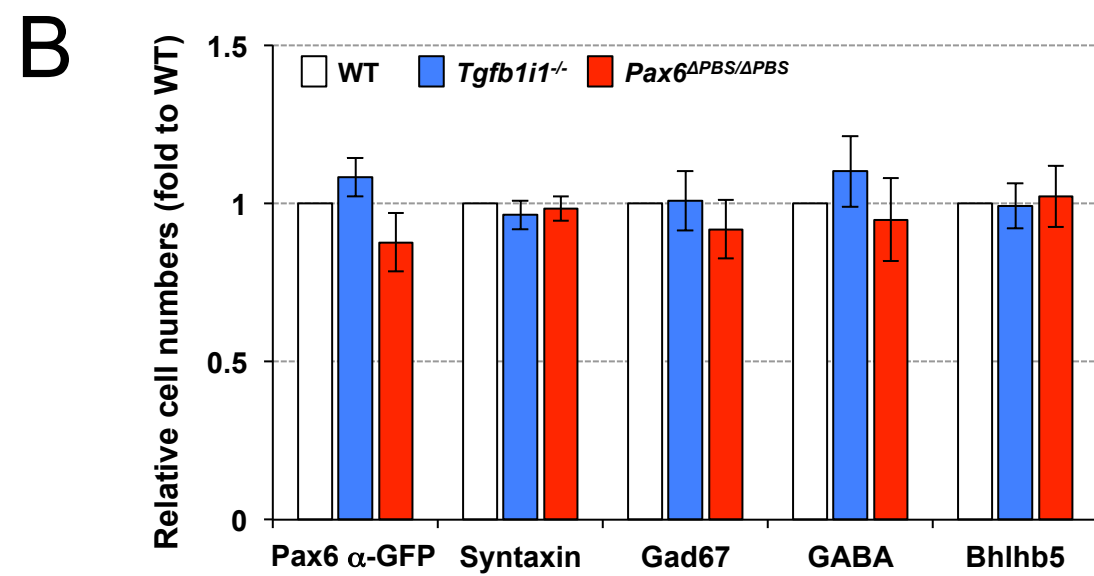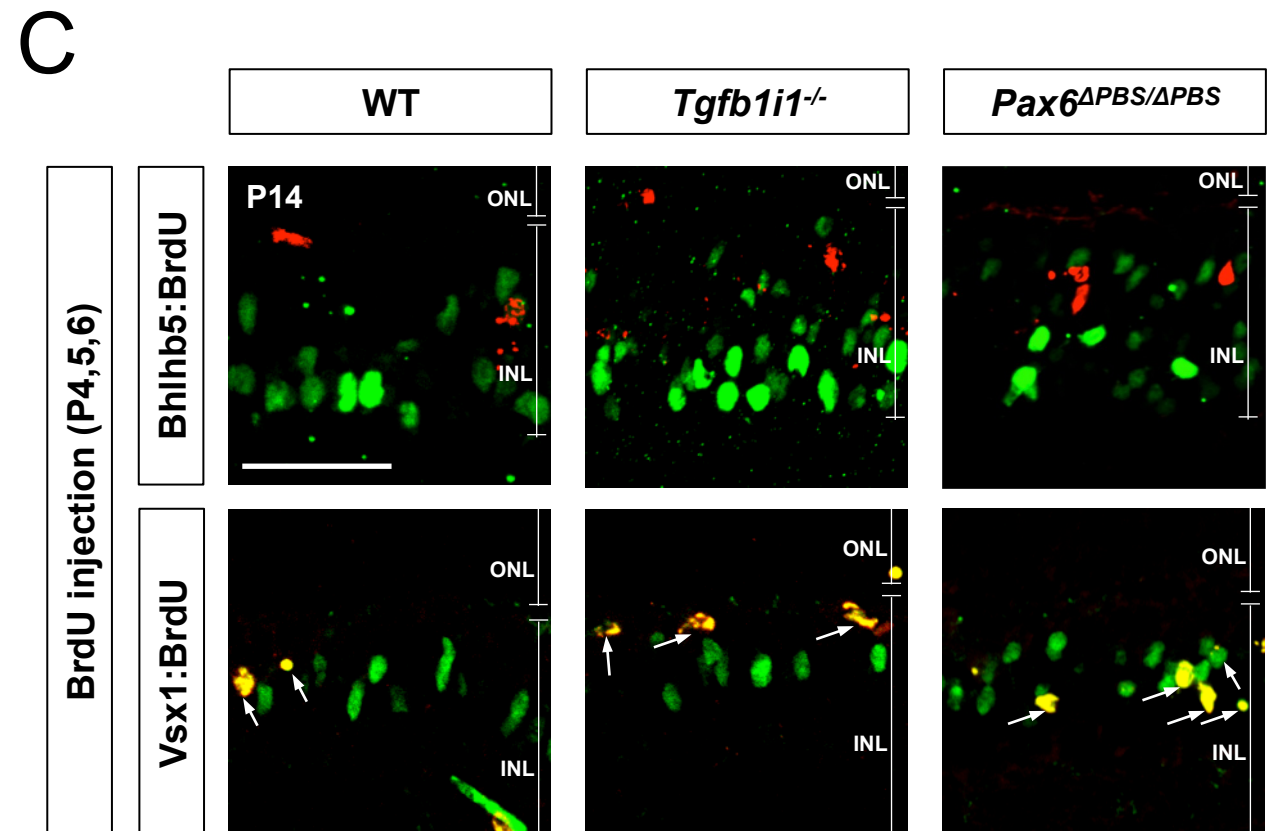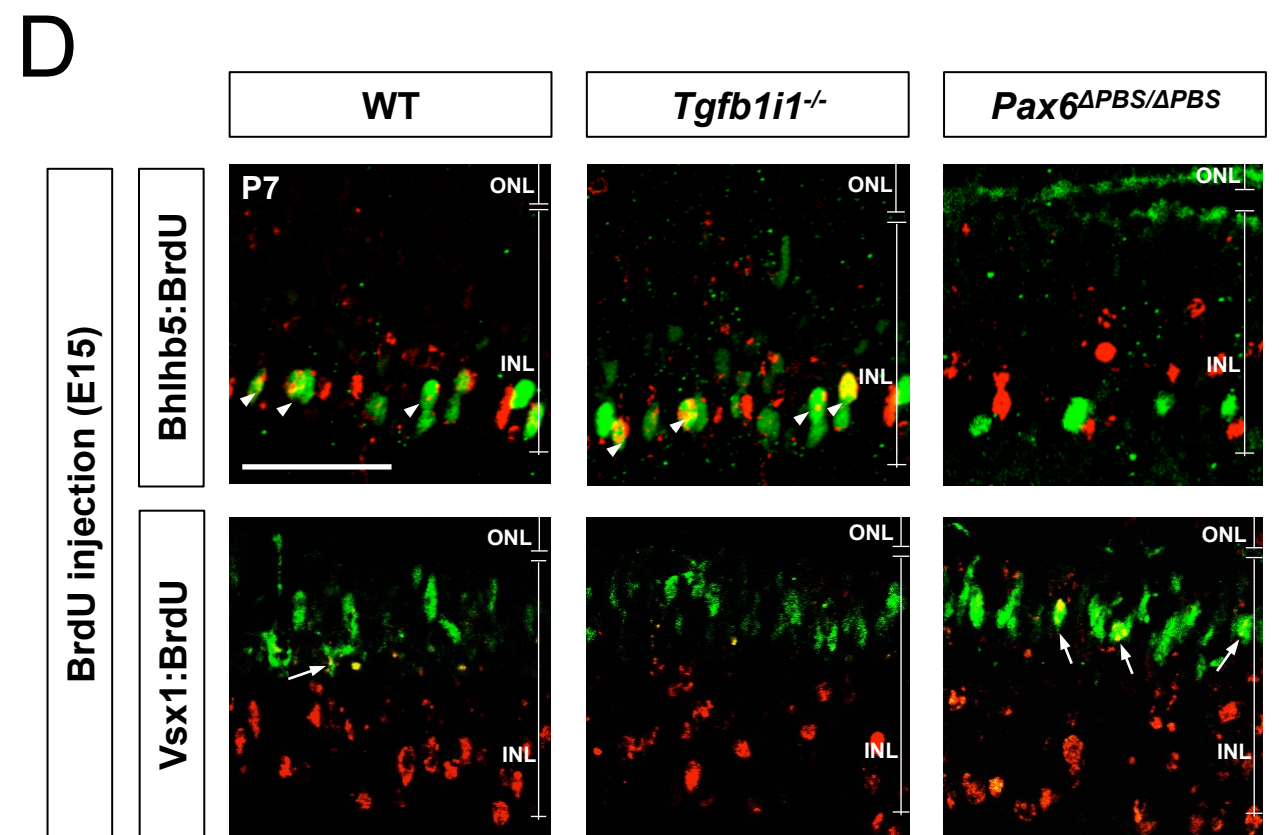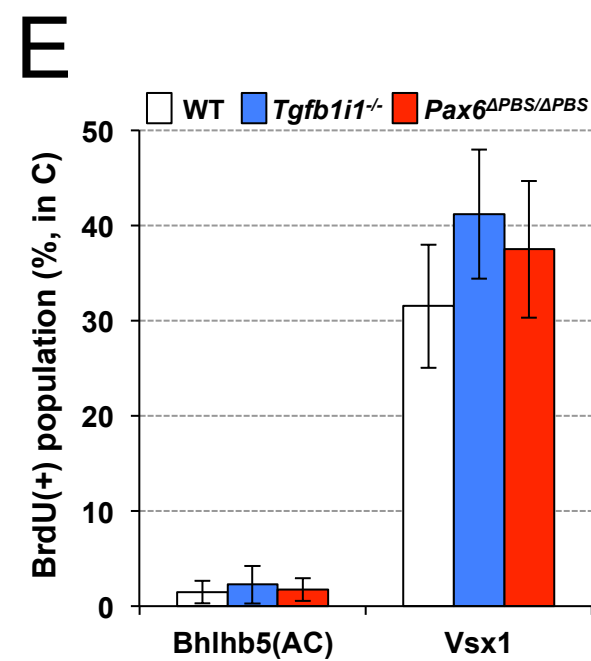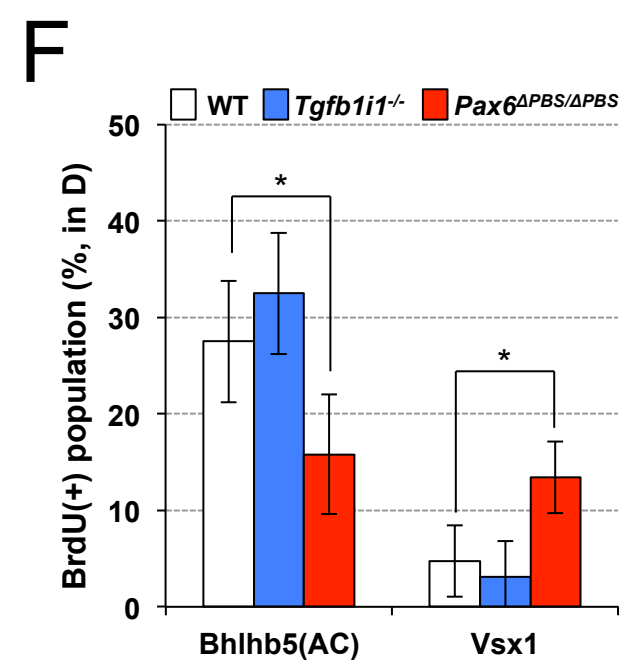

Supplement: supp [file elife-21303-supp-v1.zip]

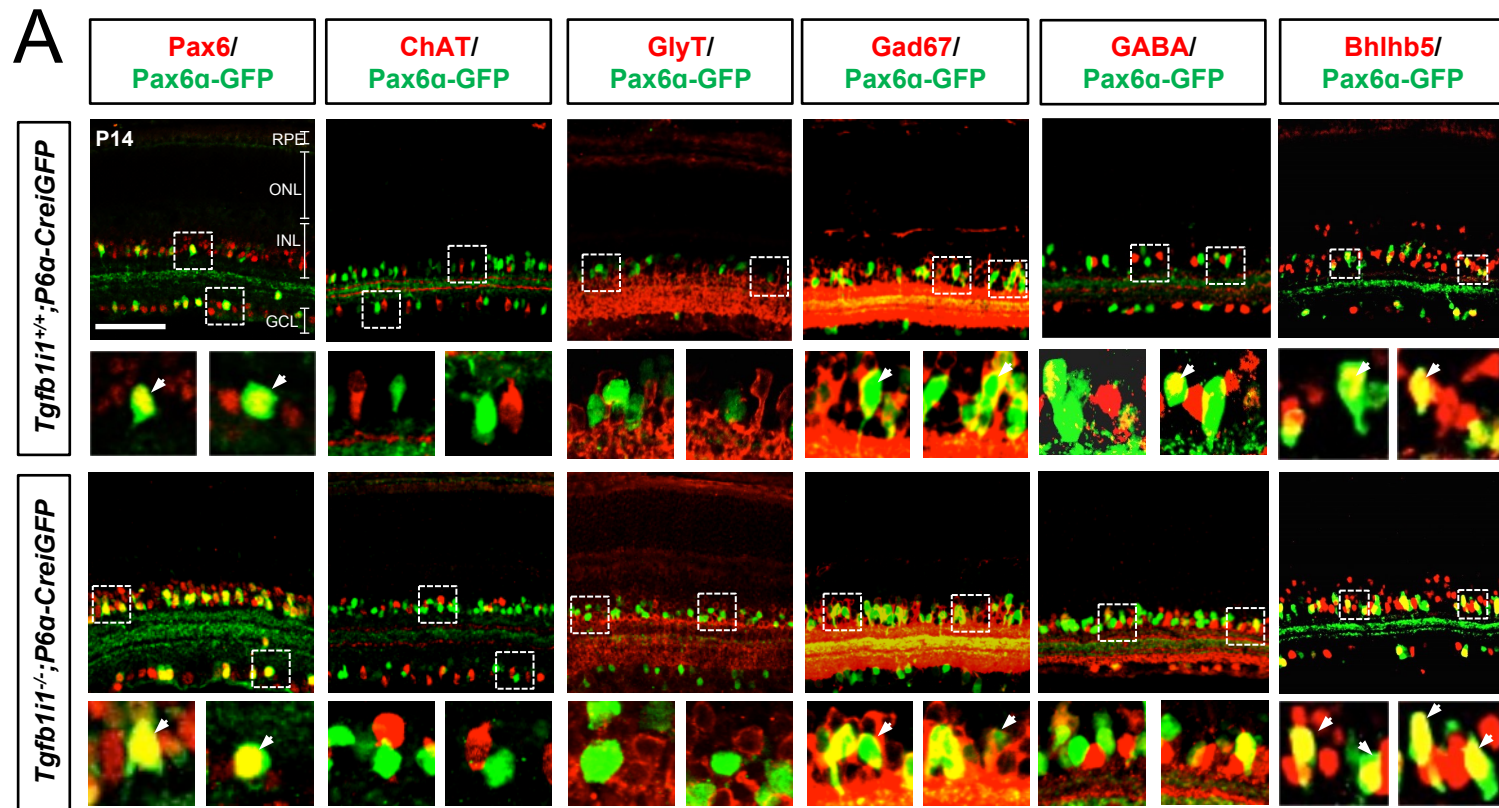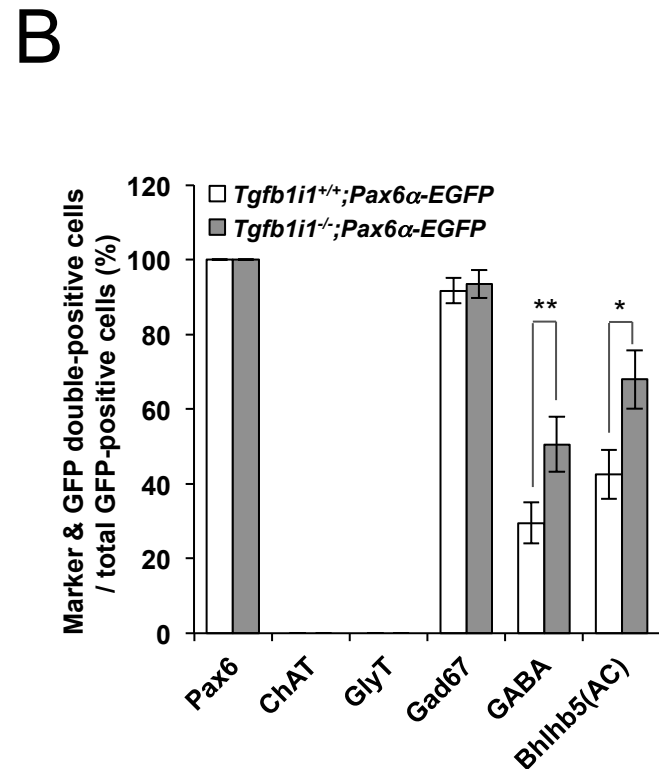

Supplement: supp [file elife-21303-supp-v1.zip]

A

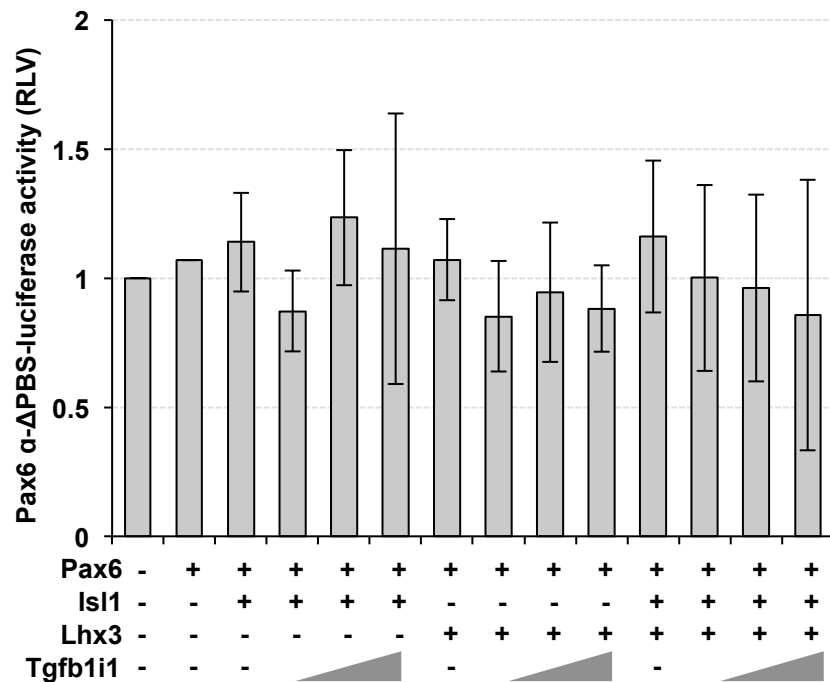

B

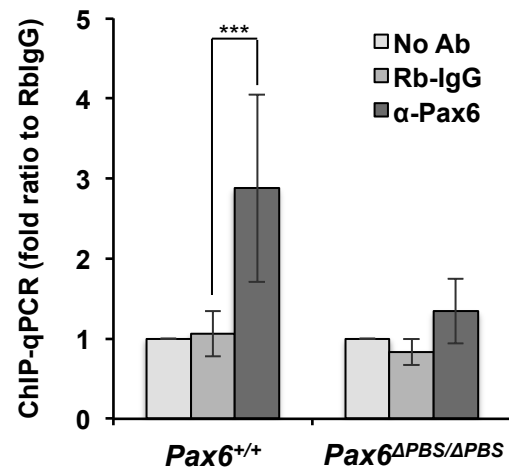

C

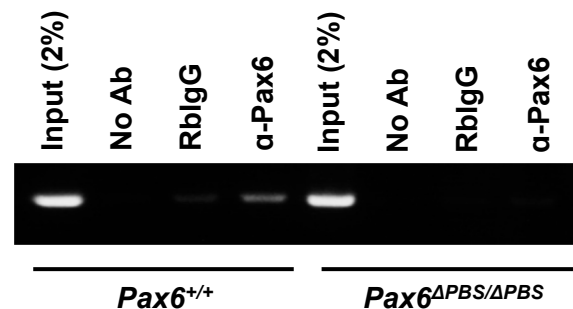

Supplement: supp [file elife-21303-supp-v1.zip]

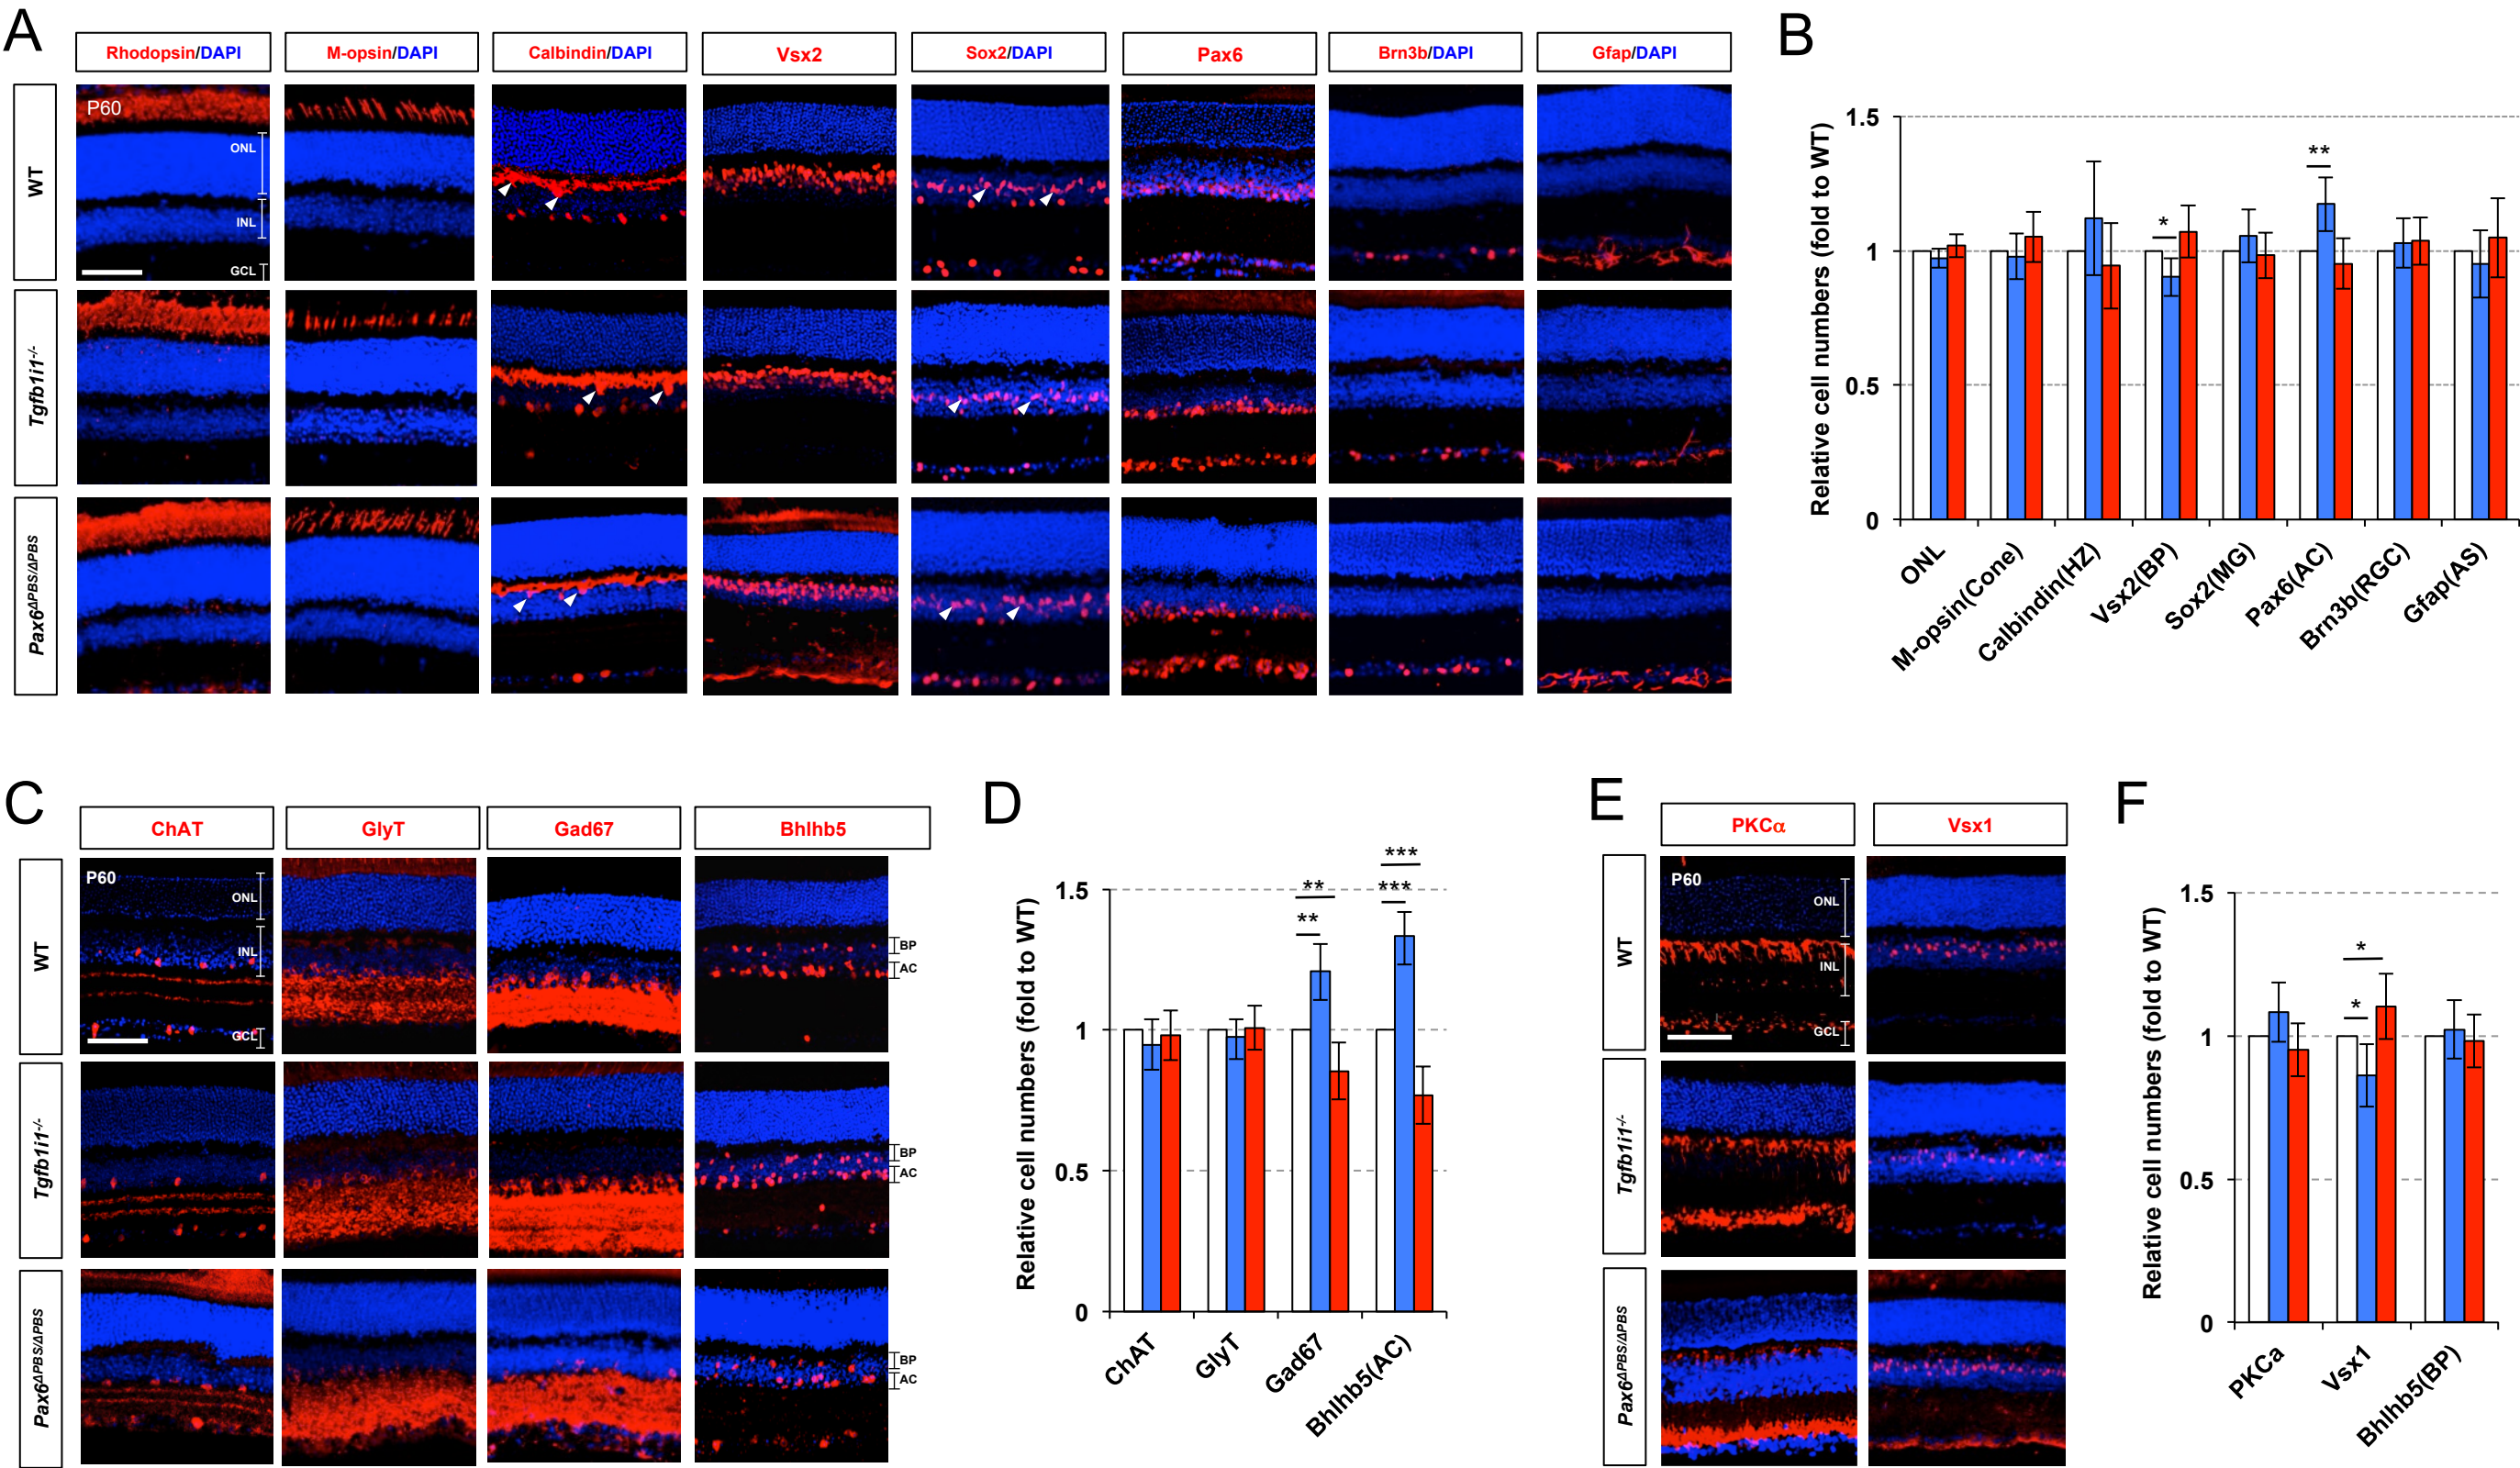

Supplement: supp [file elife-21303-supp-v1.zip]

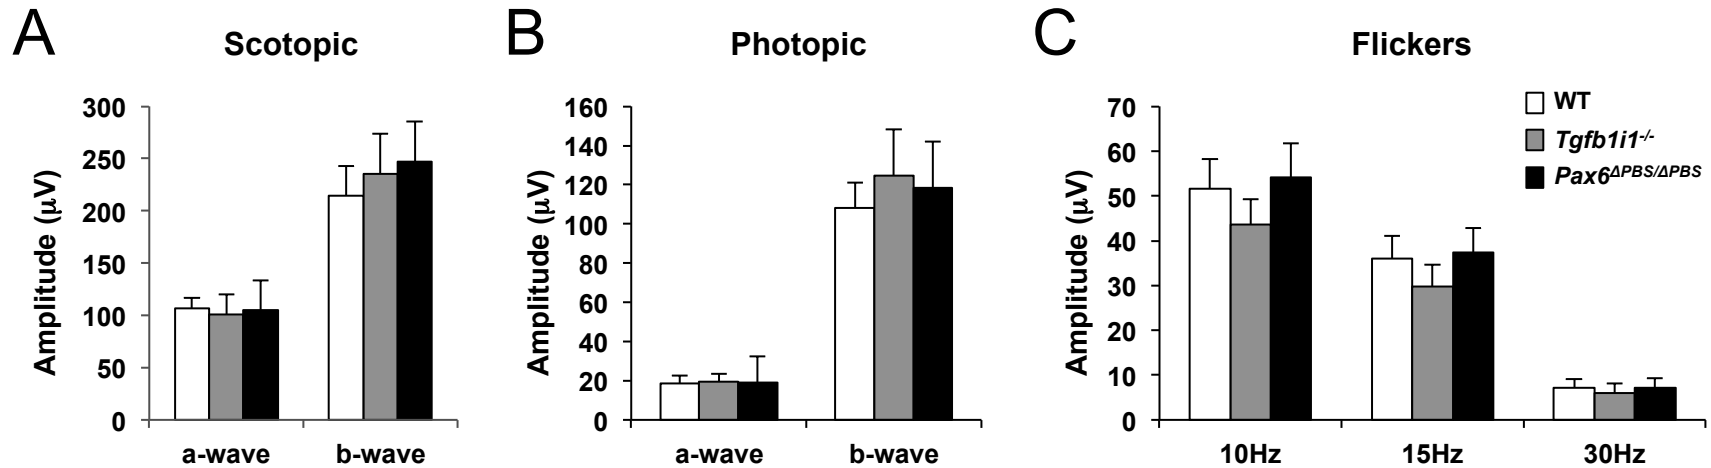

Supplement: supp [file elife-21303-supp-v1.zip]

A

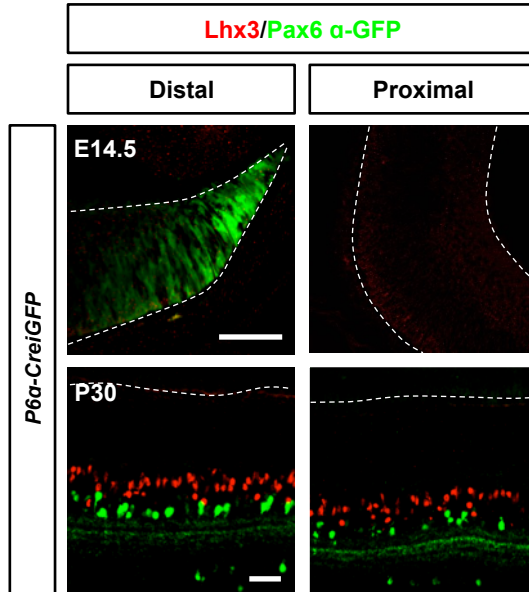

B

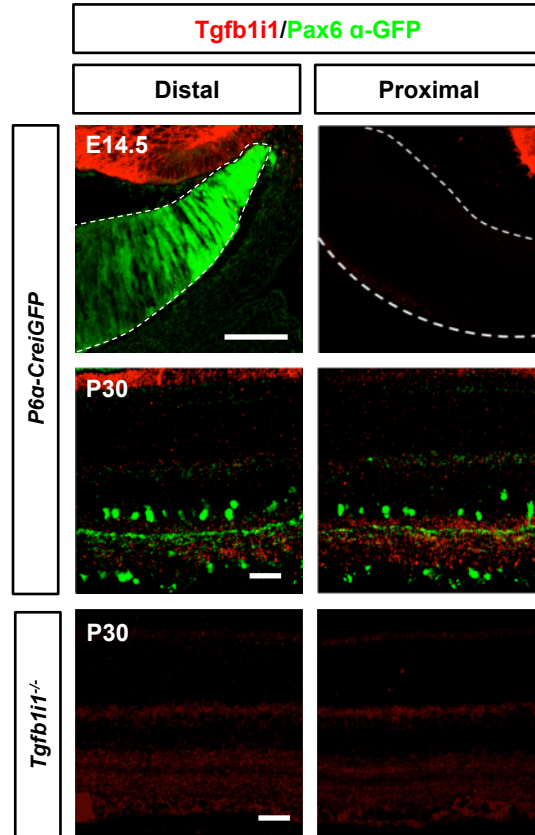

Supplement: supp [file elife-21303-supp-v1.zip]
